# Supplementary material for: Head-to-head study of oxelumab and adalimumab in a mouse model of ulcerative colitis based on NOD/Scid IL2Rγnull mice reconstituted with human peripheral blood mononuclear cells
Source: PubMed Central journal article supplement (PMC7847261; doi:10.1242/dmm.046995), 2021-01-21
Supplement: dmm-14-046995-s1.pdf [file dmm-14-046995-s1.pdf]

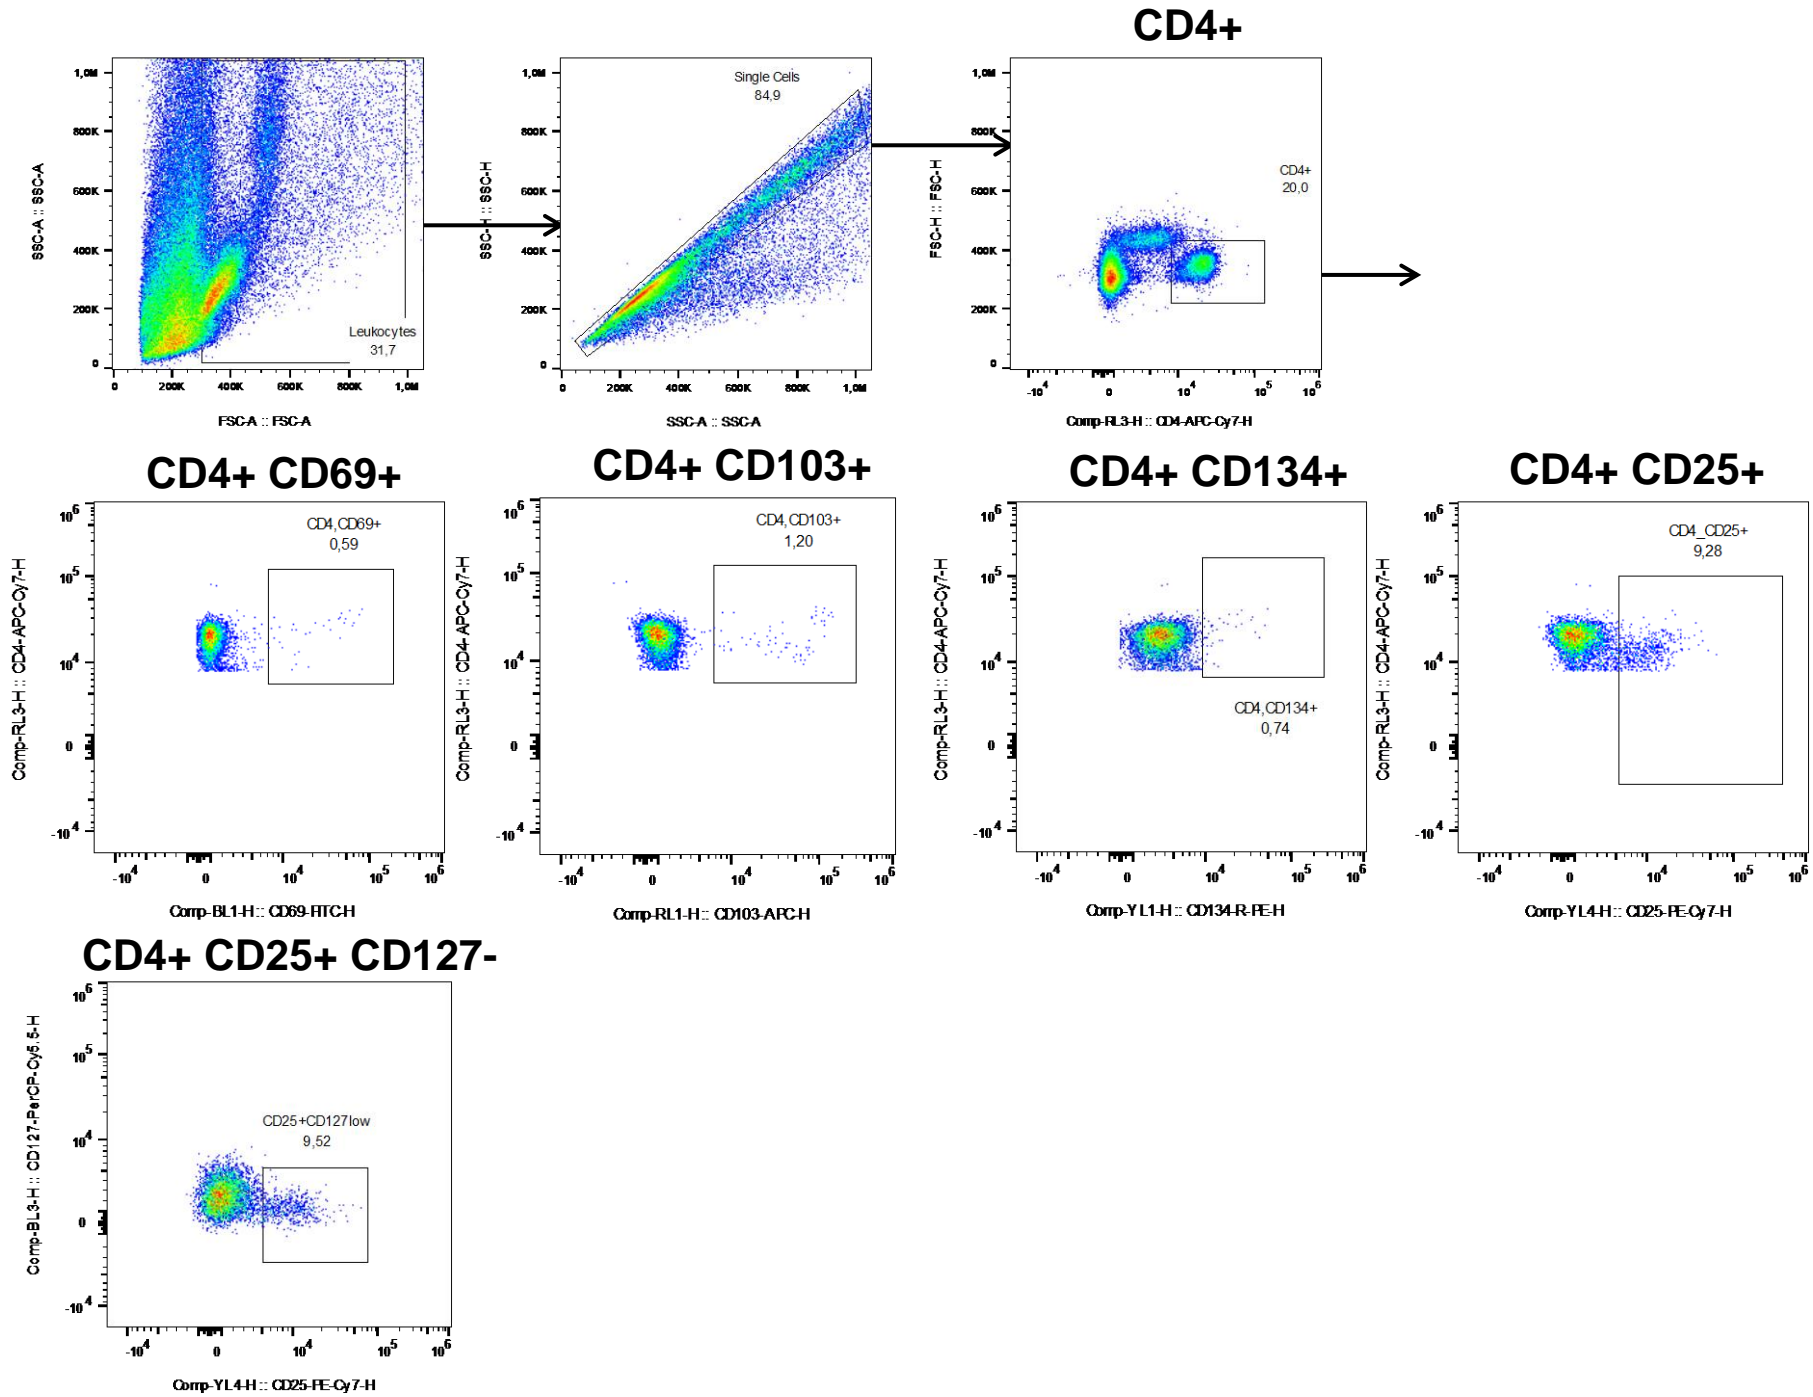

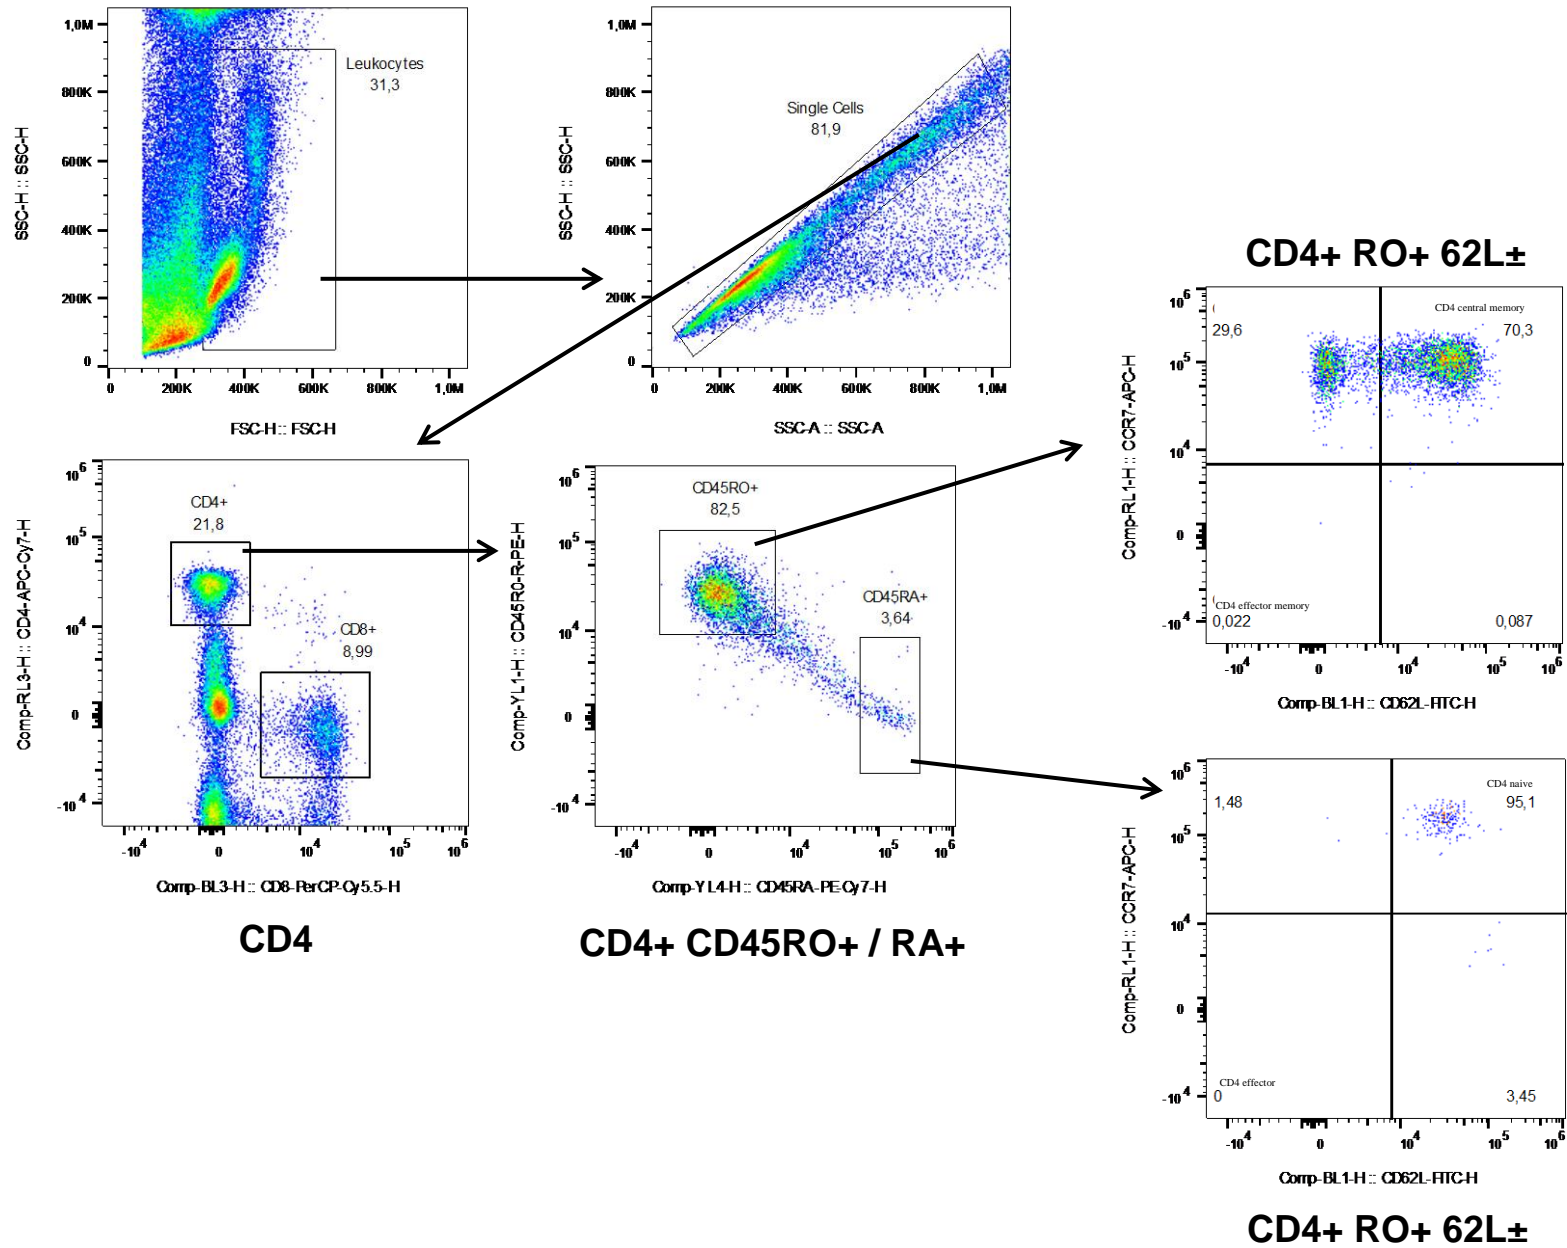

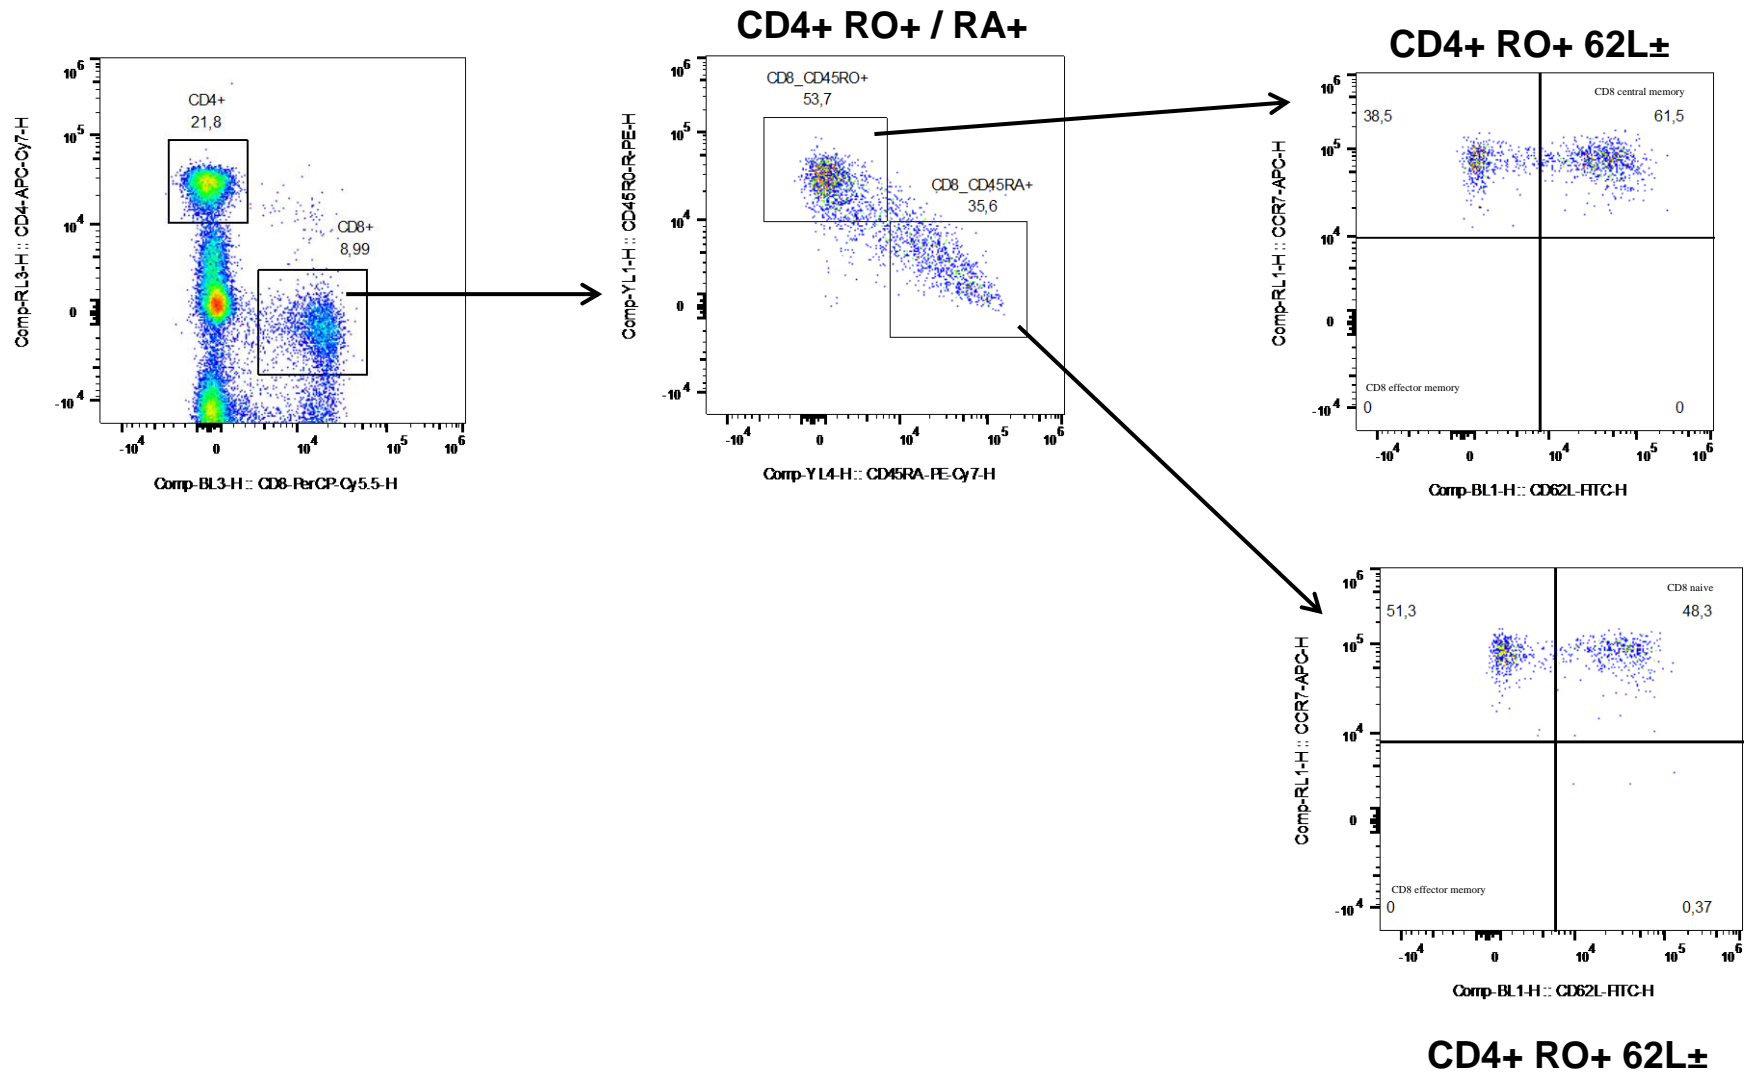

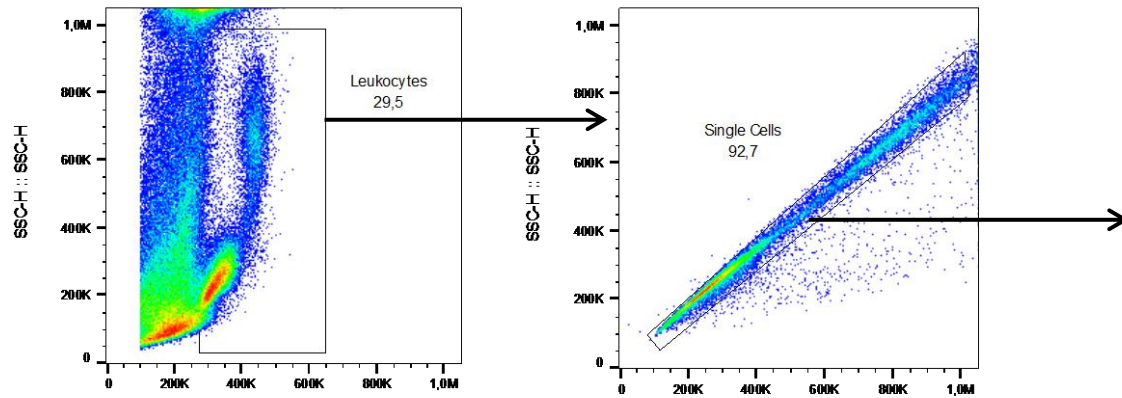

**CXCR3+**

**CXCR6+**

**CXCR10+**

**CXCR4+**

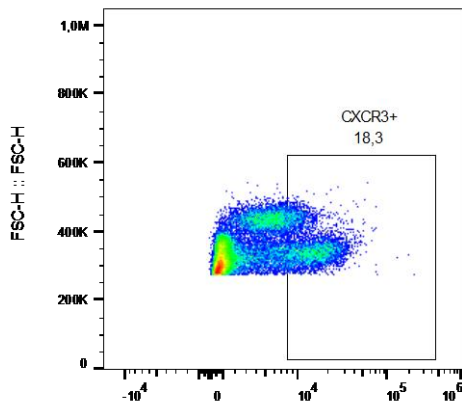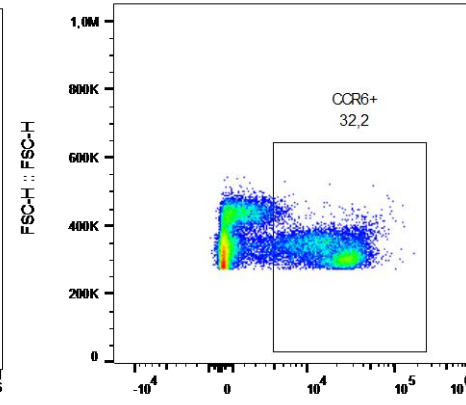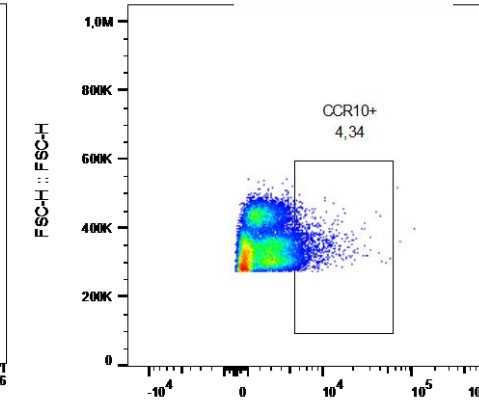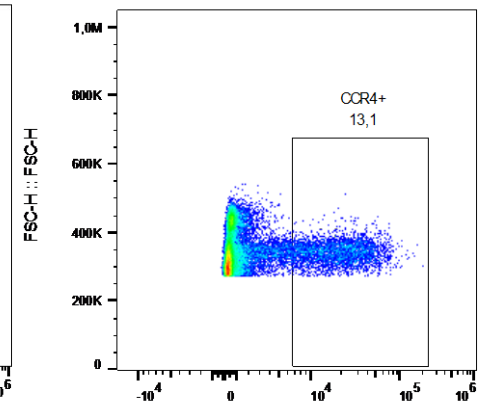

Comp-BL1-H :: CXCR3-FITC

Comp-YL4-H :: CCR6-PE-Cy7-H

Comp-RL1-H :: CCR10-APC-H

Comp-YL1-H :: CCR4-R-PE-H

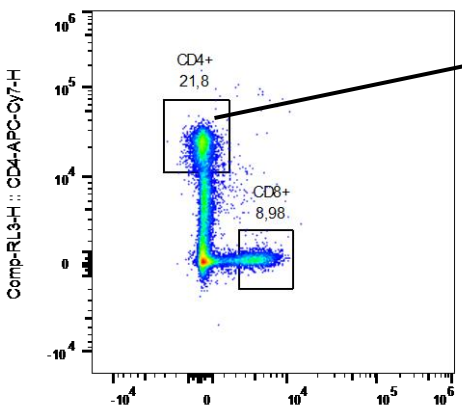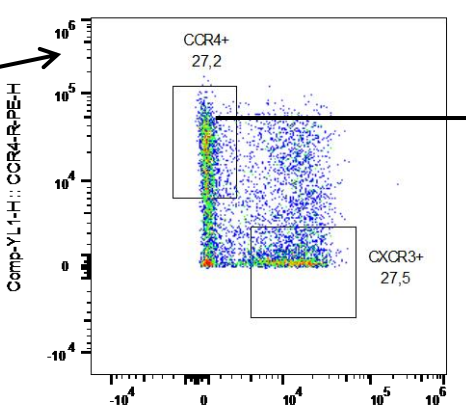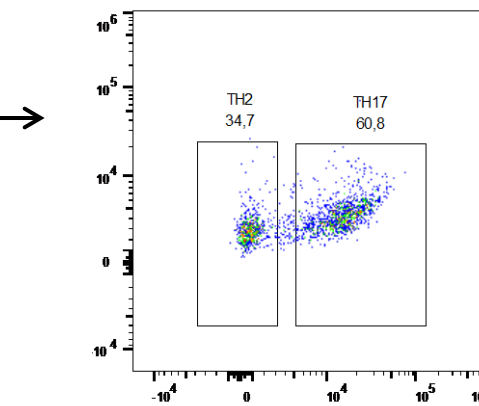

Comp-BL3-H :: CD8-PerCP-Cy5.5-H

Comp-BL1-H :: CXCR3-FITC

Comp-YL4-H :: CCR6-PE-Cy7-H

**CD4+ / CD8+**

**CD4+ CCR4+**

**CD4+ CCR4+ CCR6±**

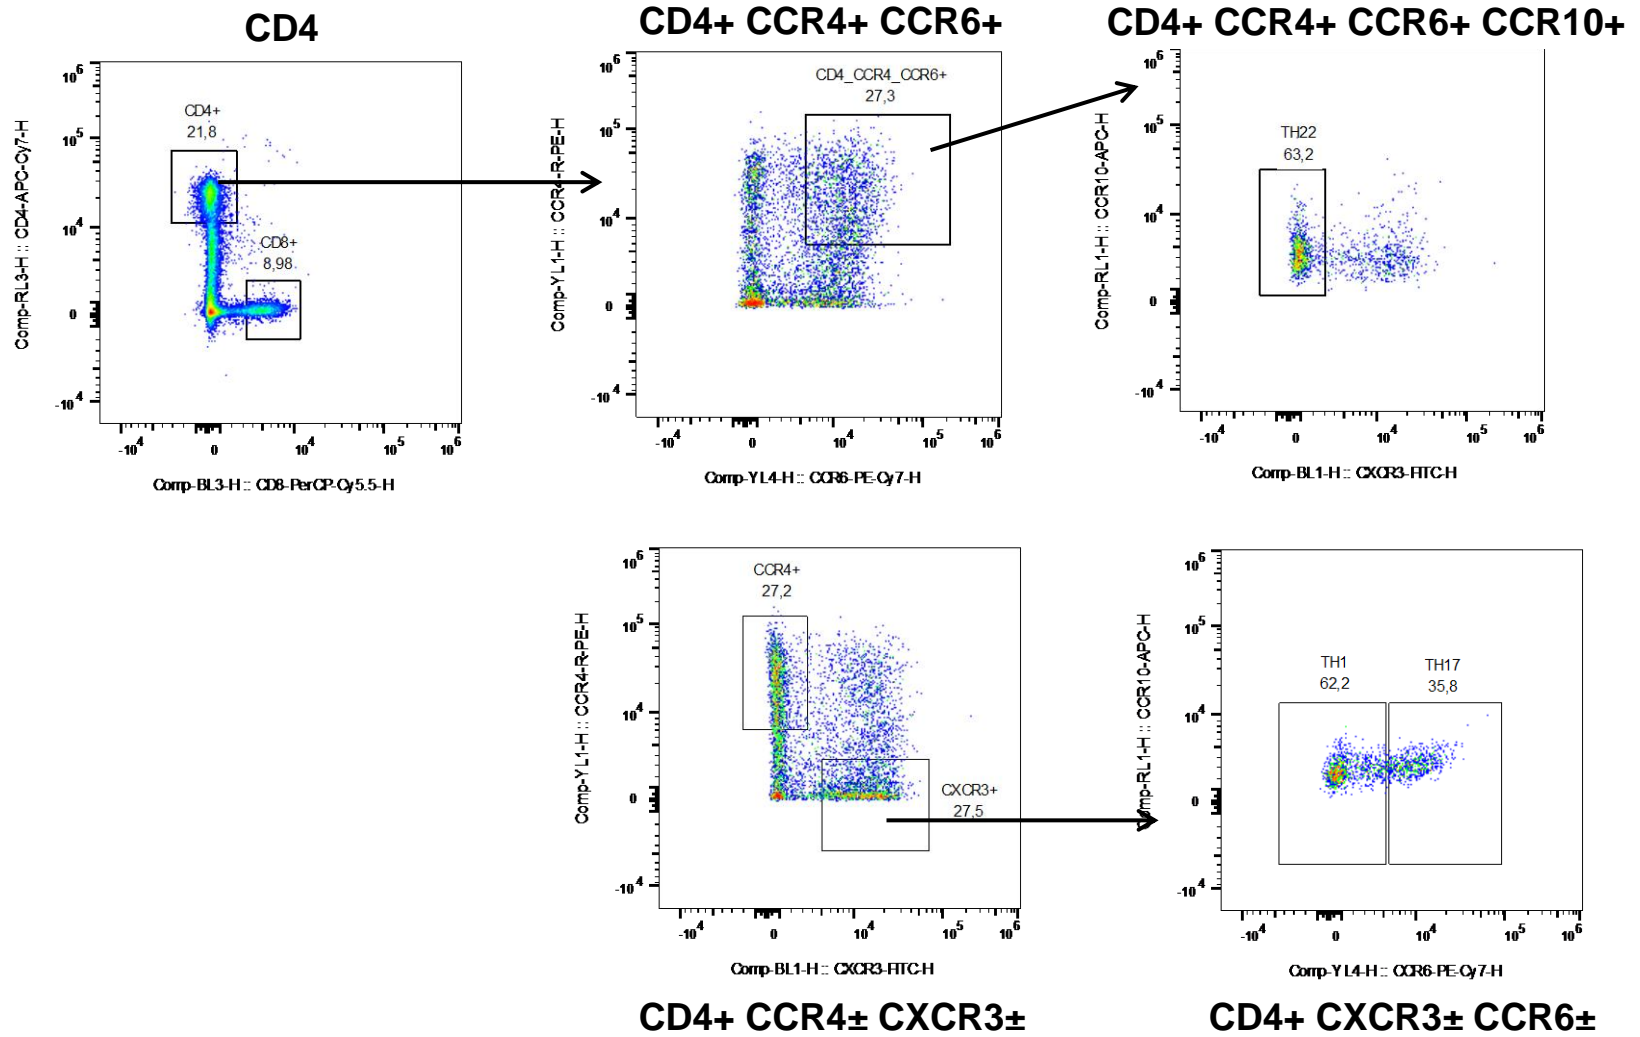

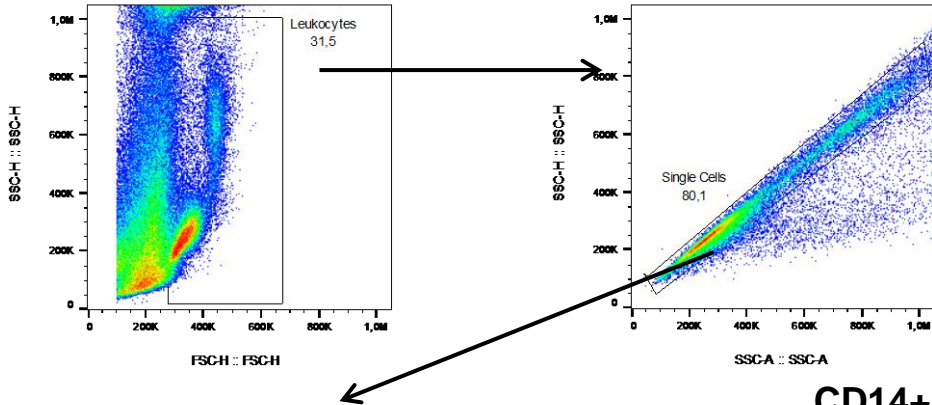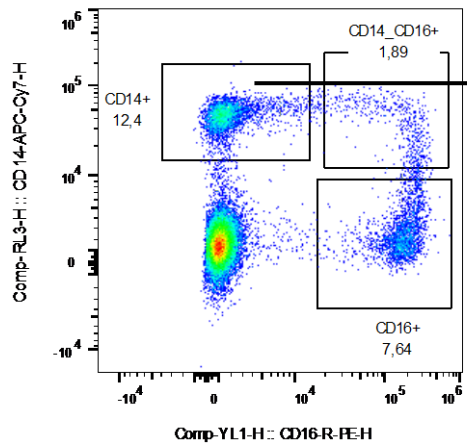

**CD14+ CD16+**

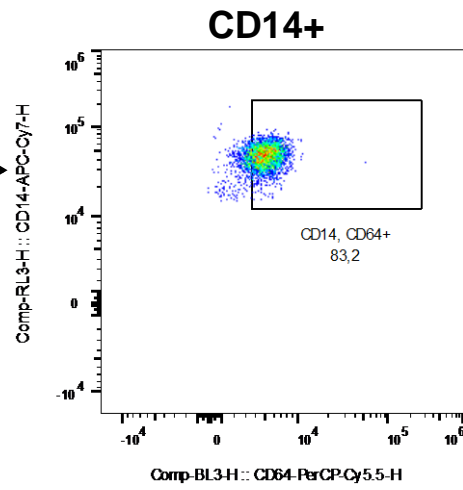

**CD14+**

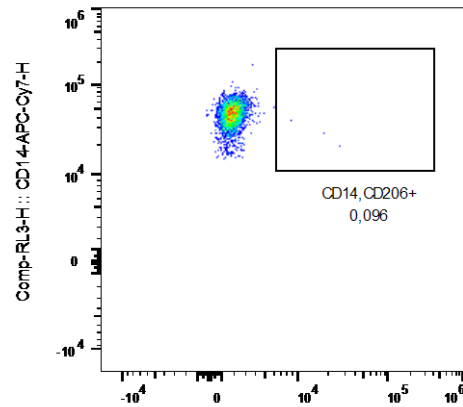

**CD14+ CD206+**

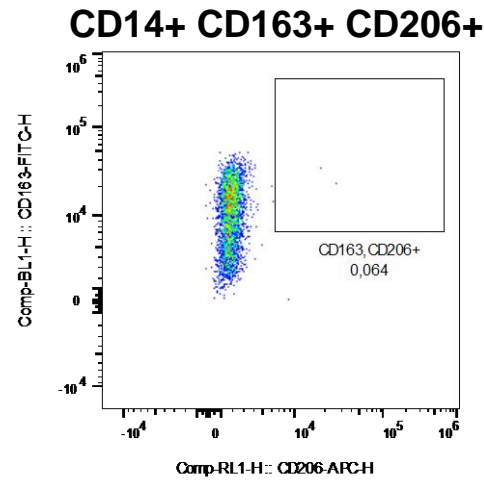

**CD14+ CD163+ CD206+**

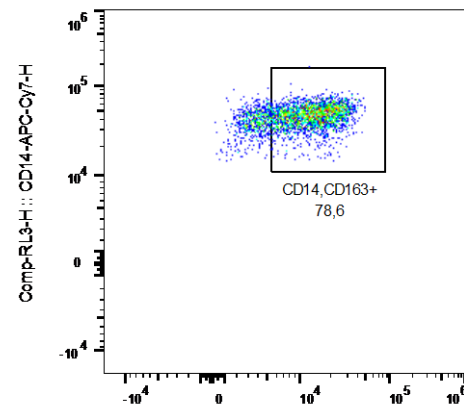

**CD14+ CD163+**

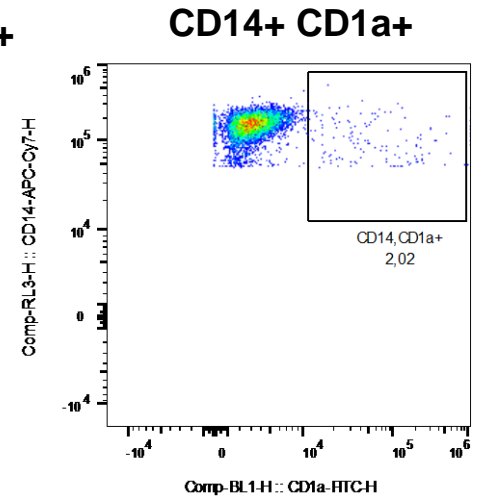

**CD14+ CD1a+**

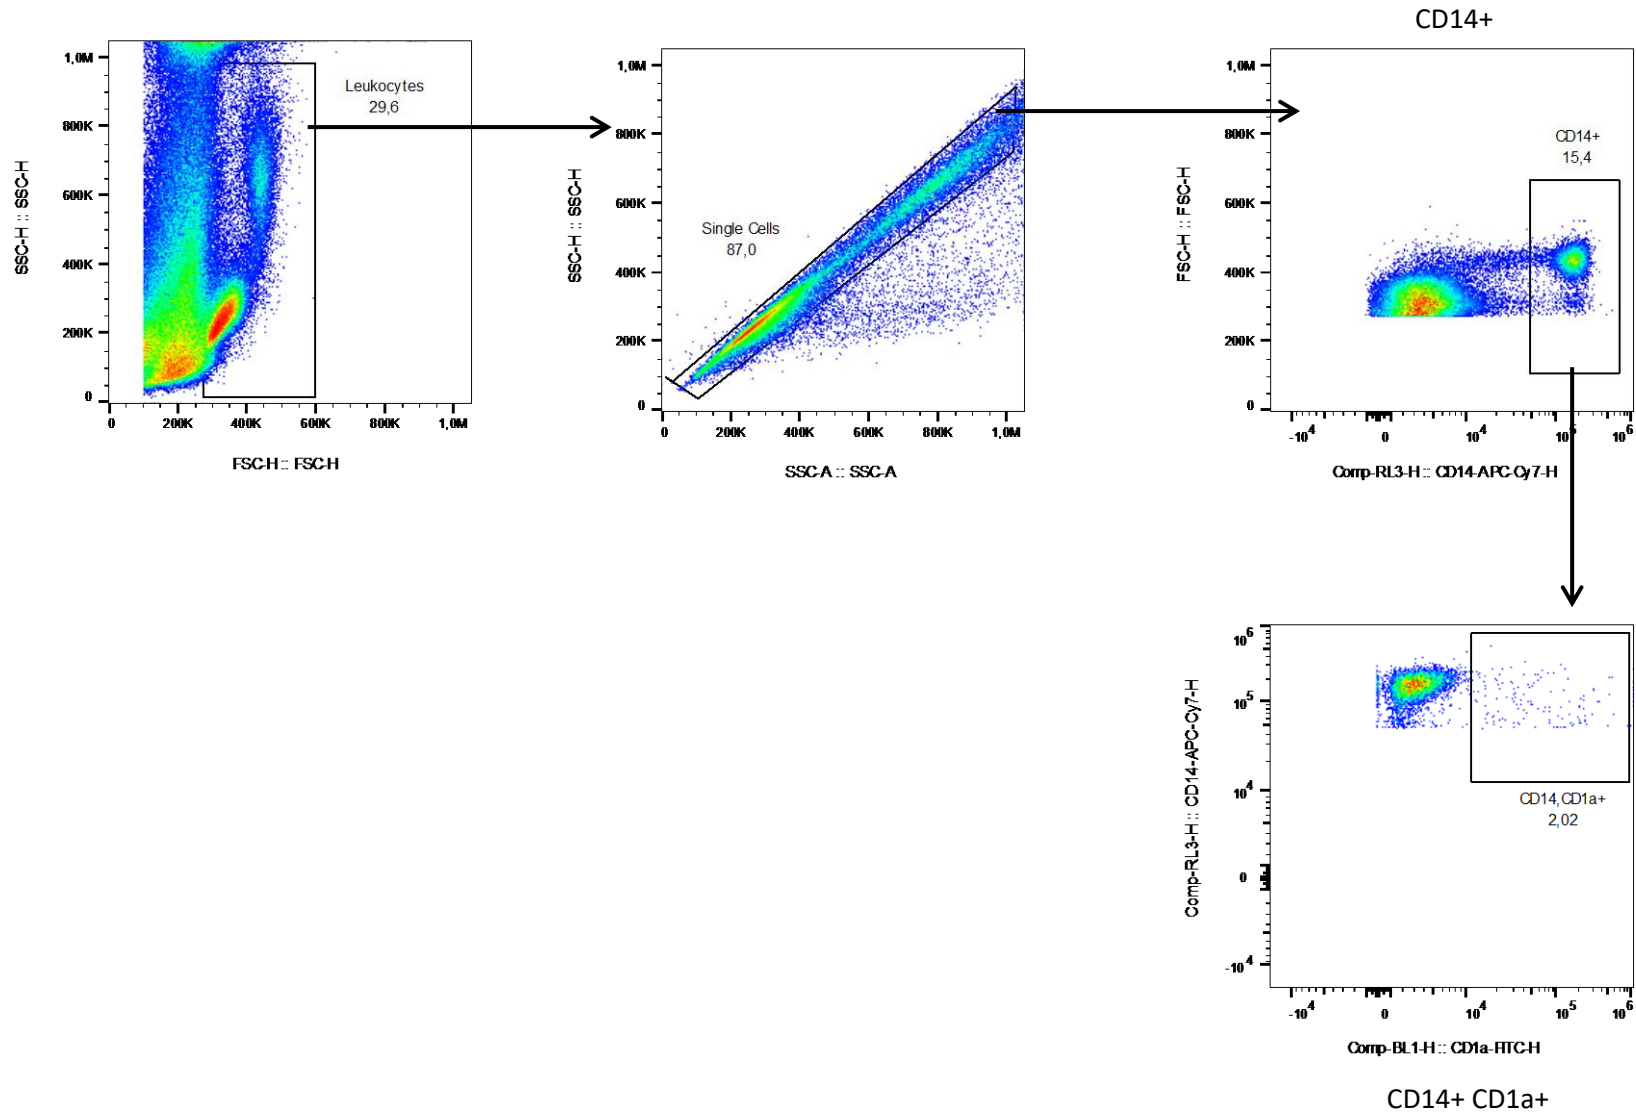



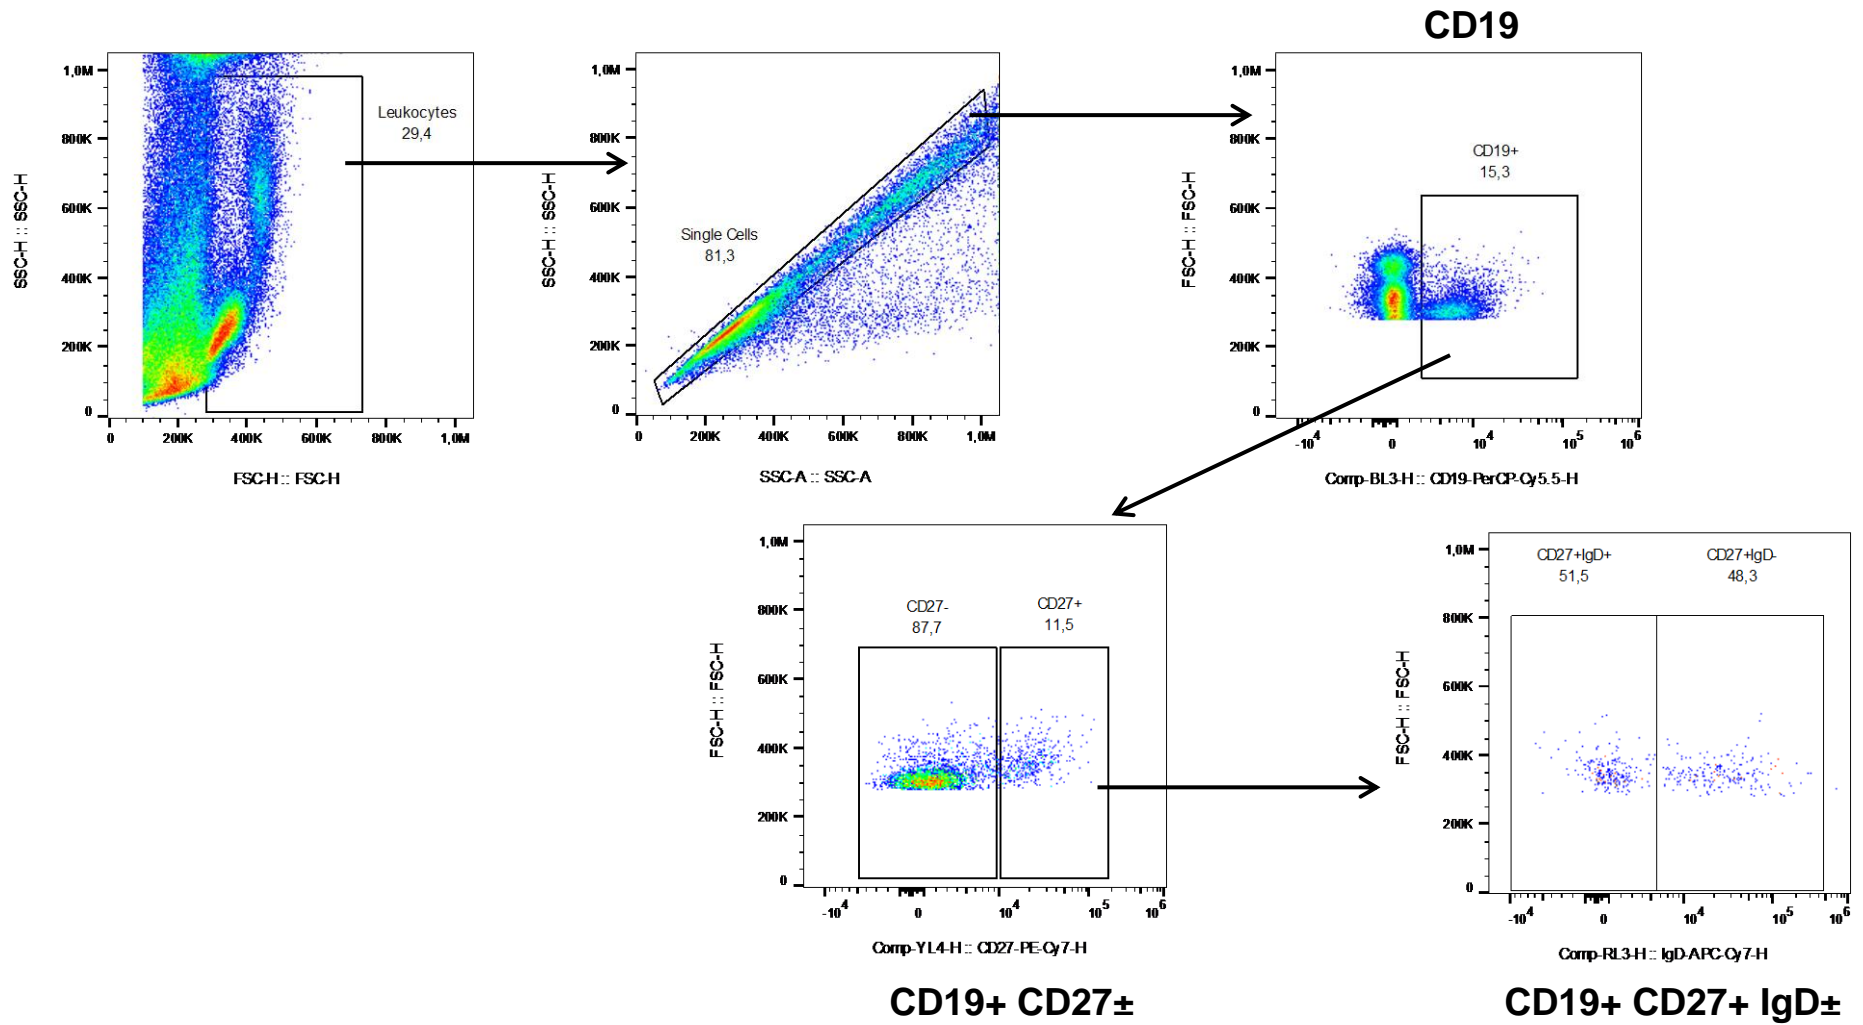



**B**

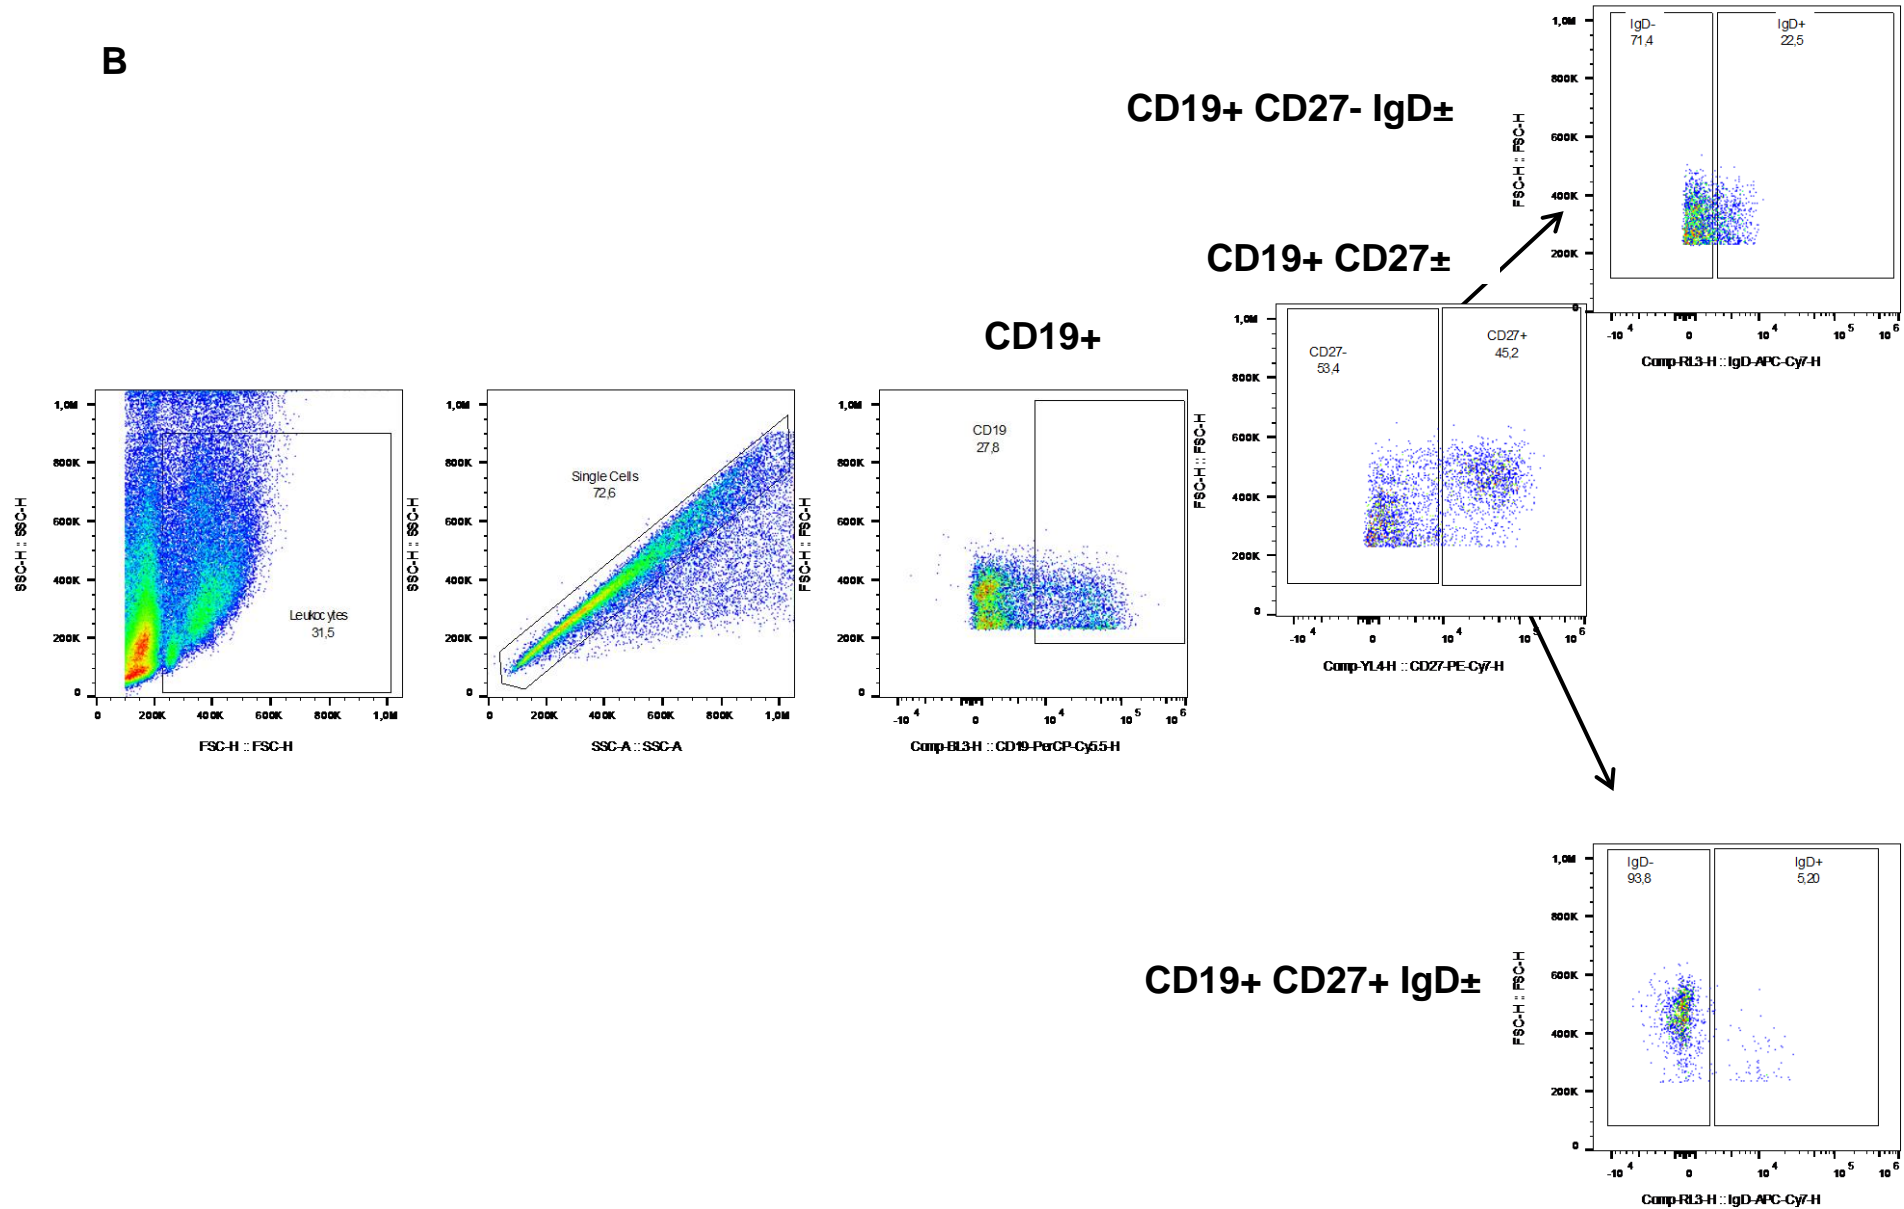

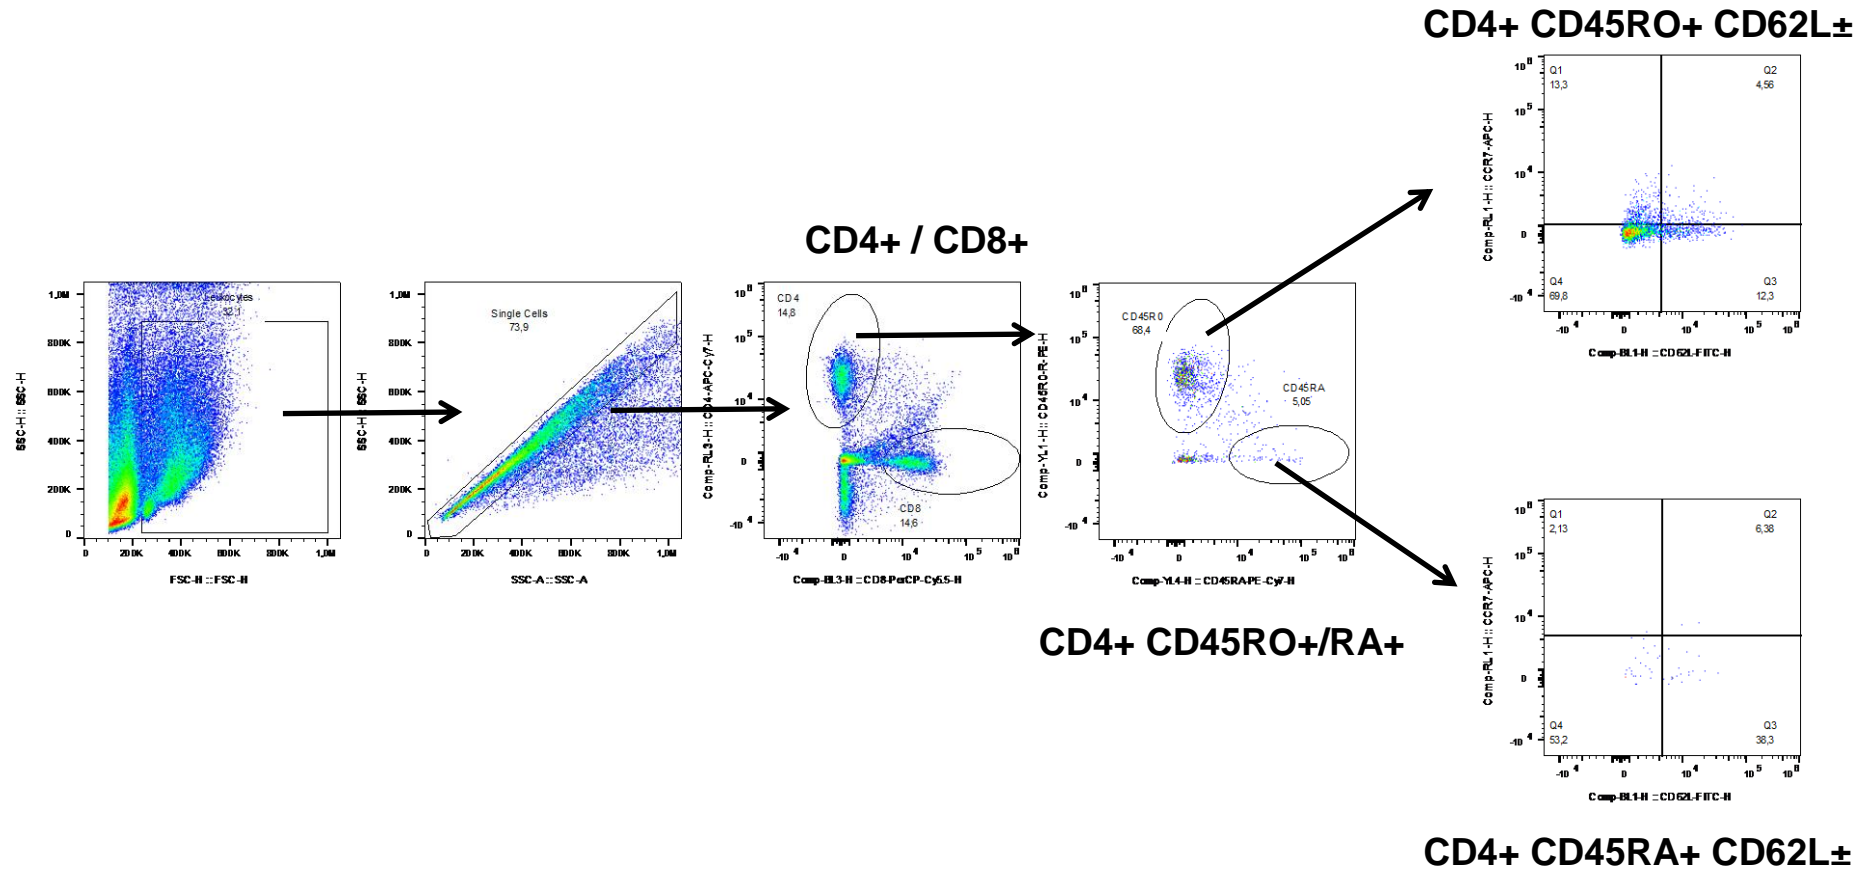

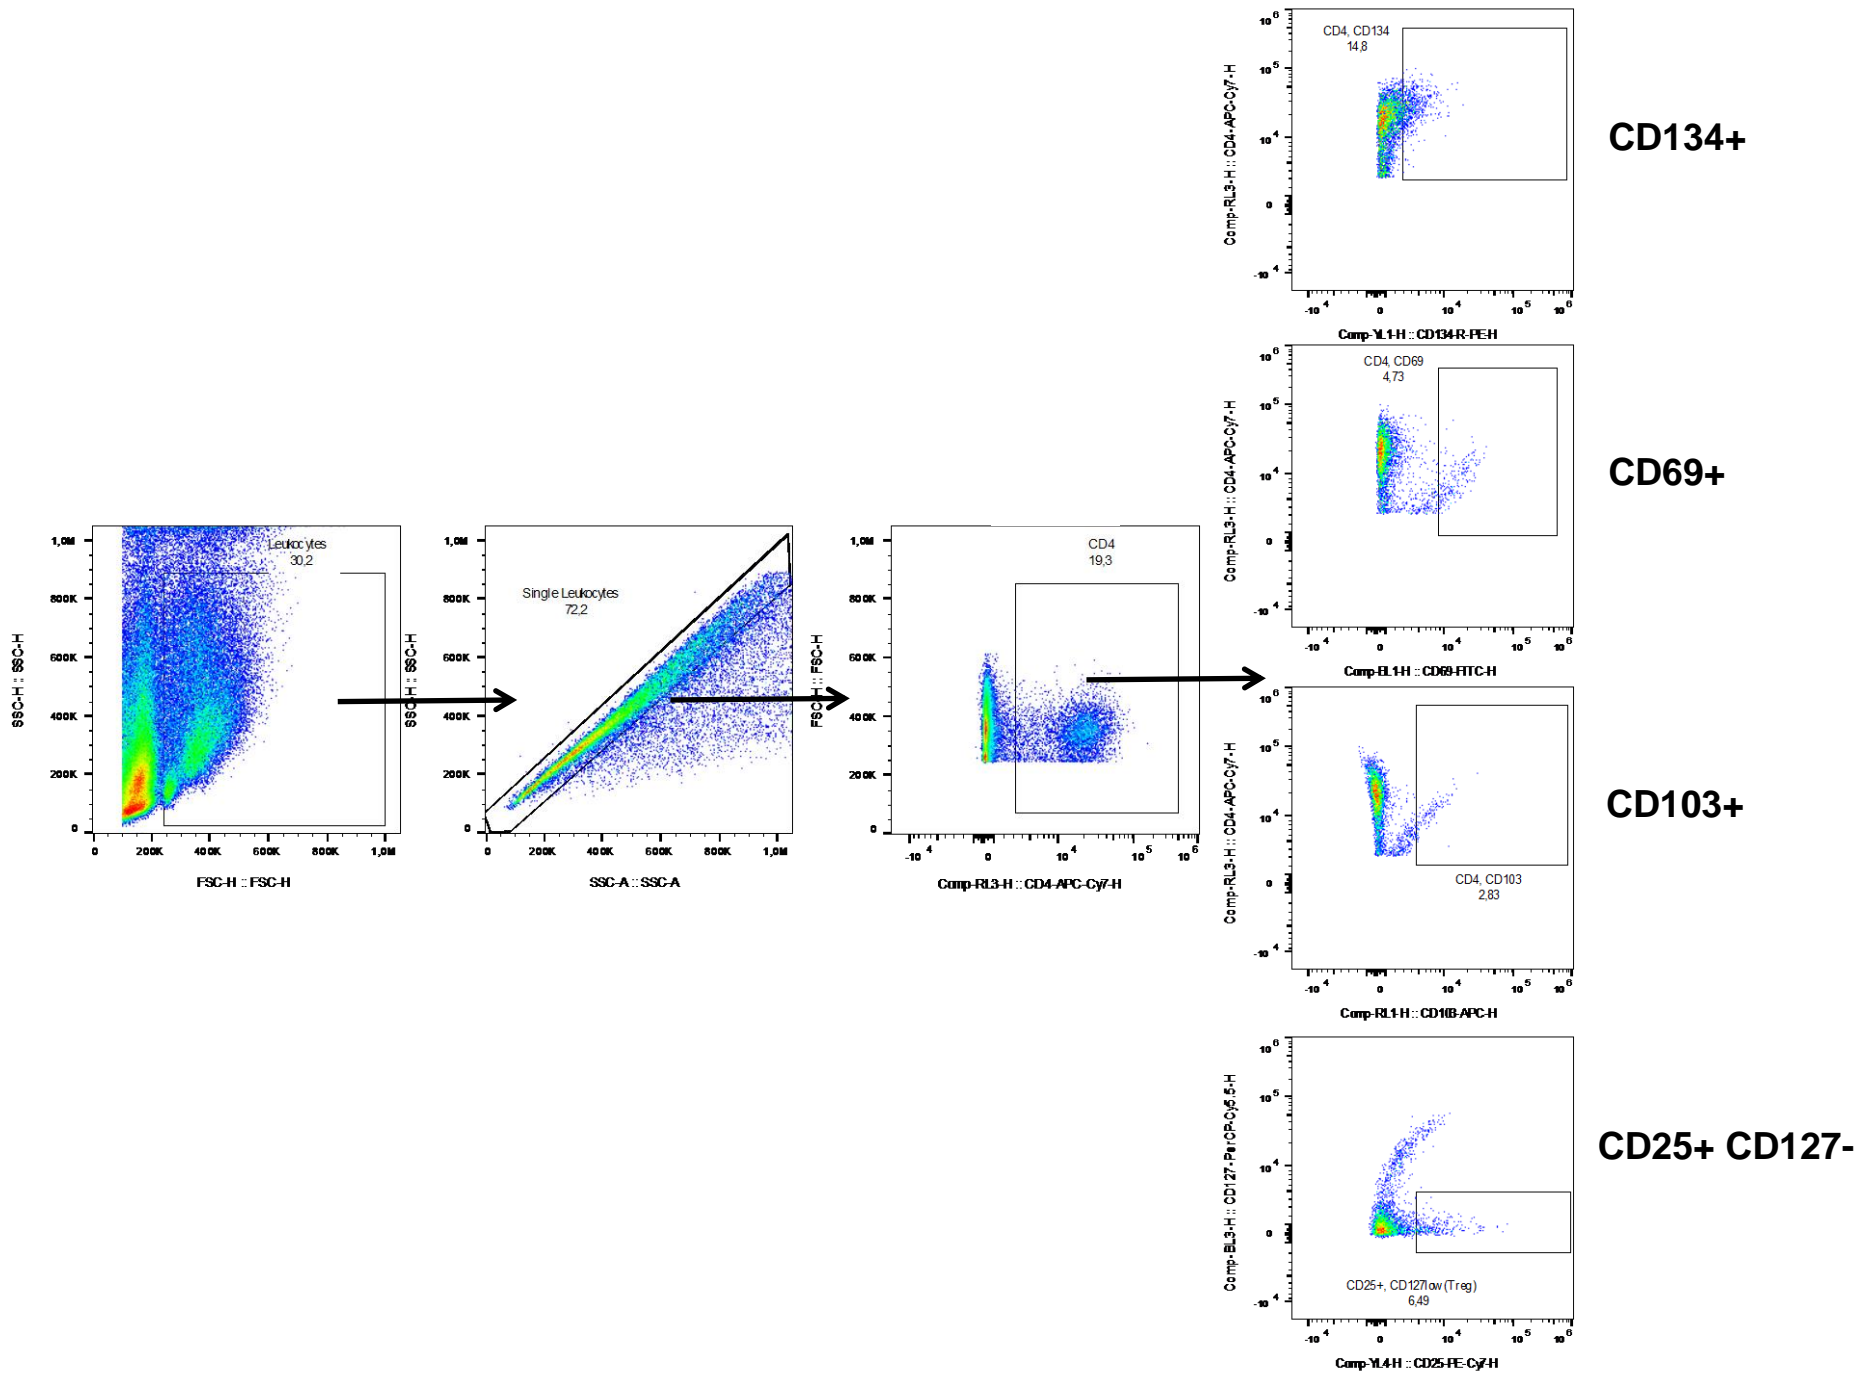

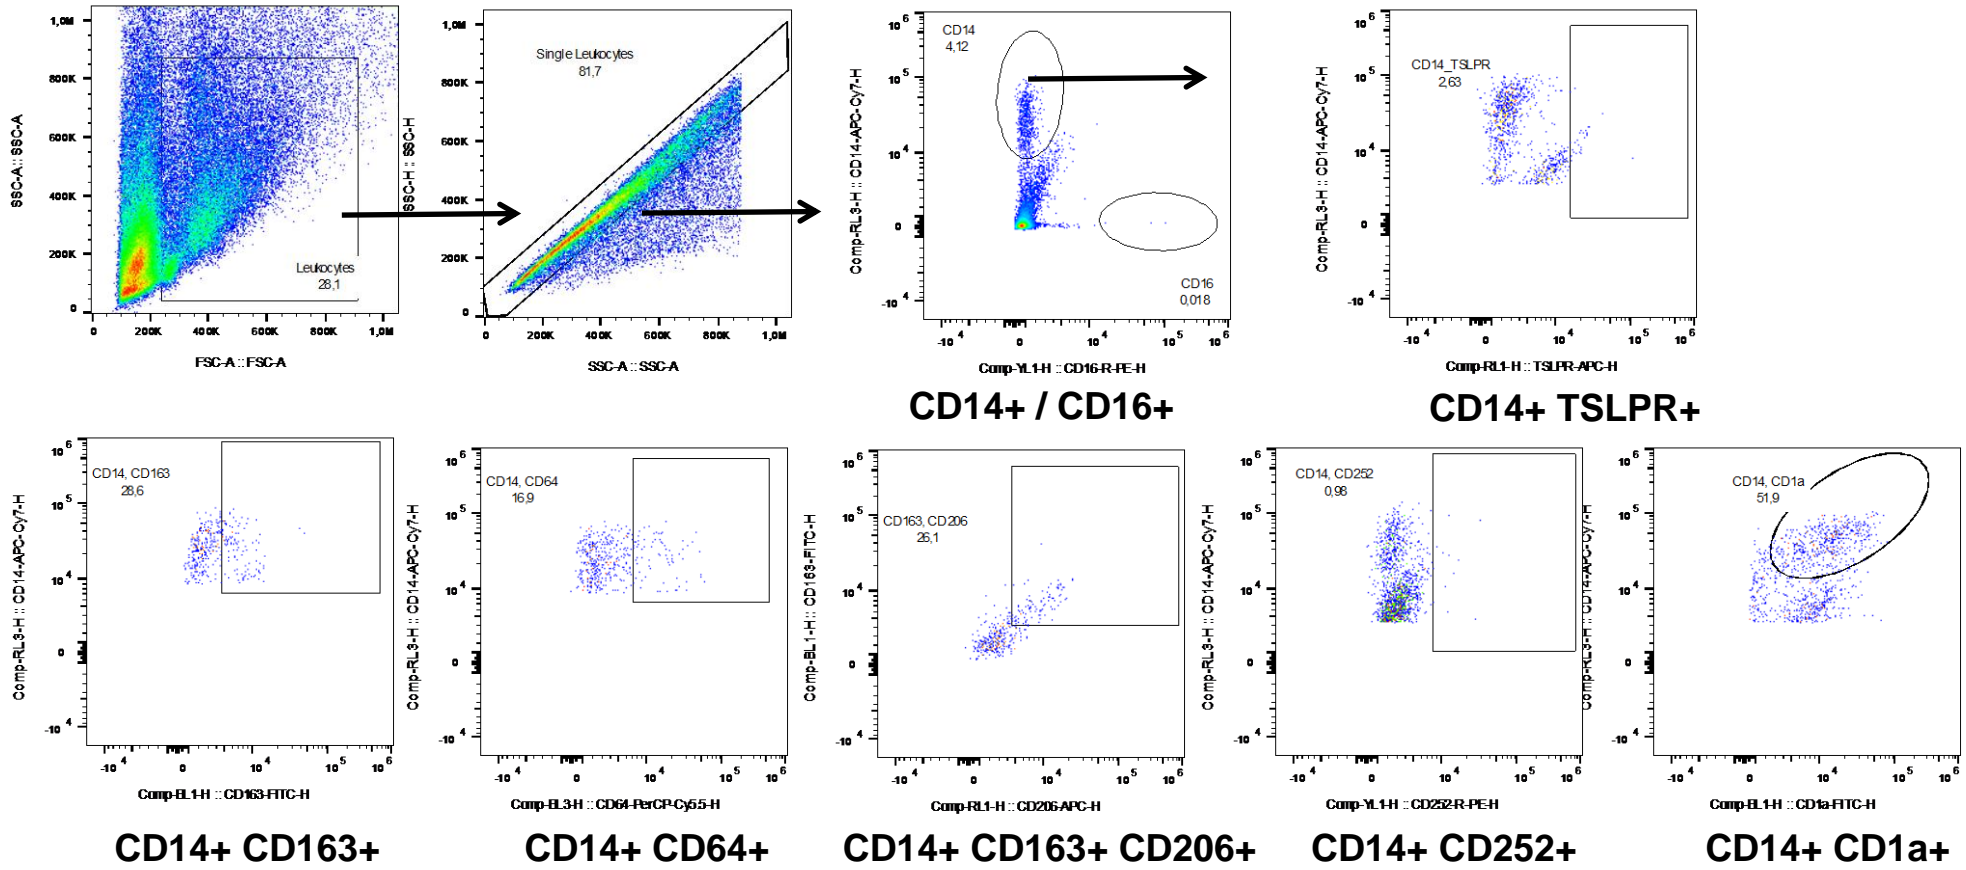

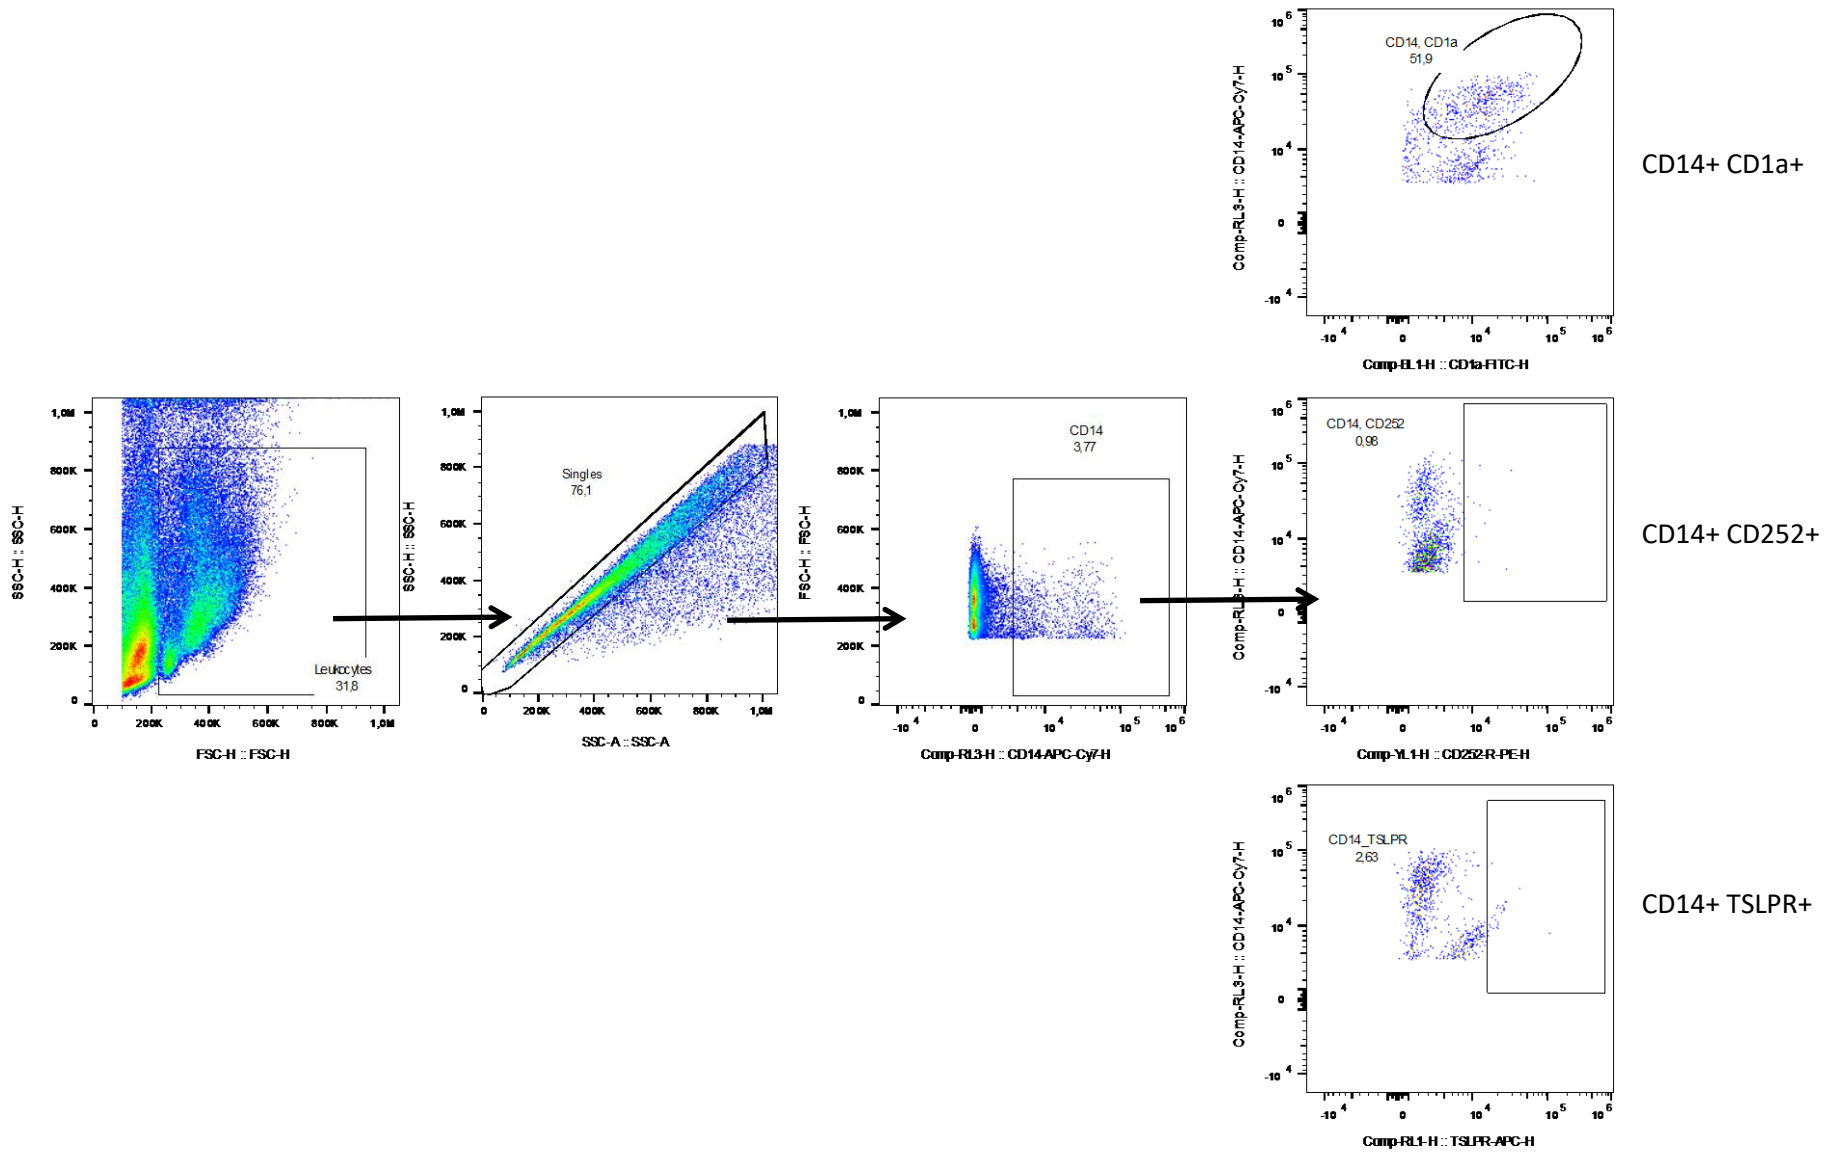

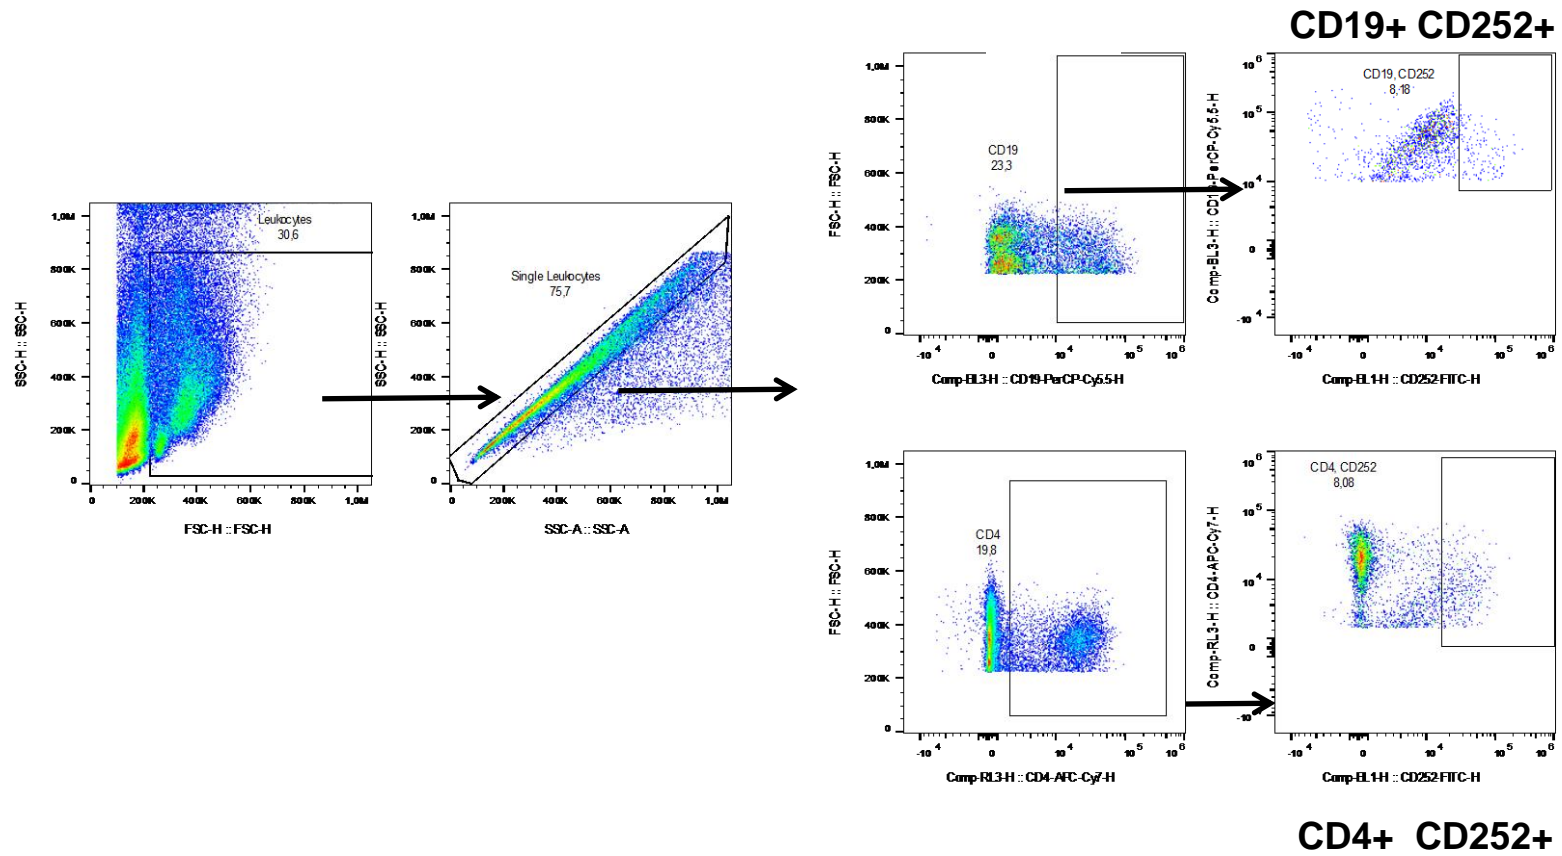

Figure S1 Gating Strategy. (A) human PBMC; (B) human leukocytes isolated from mouse spleen.



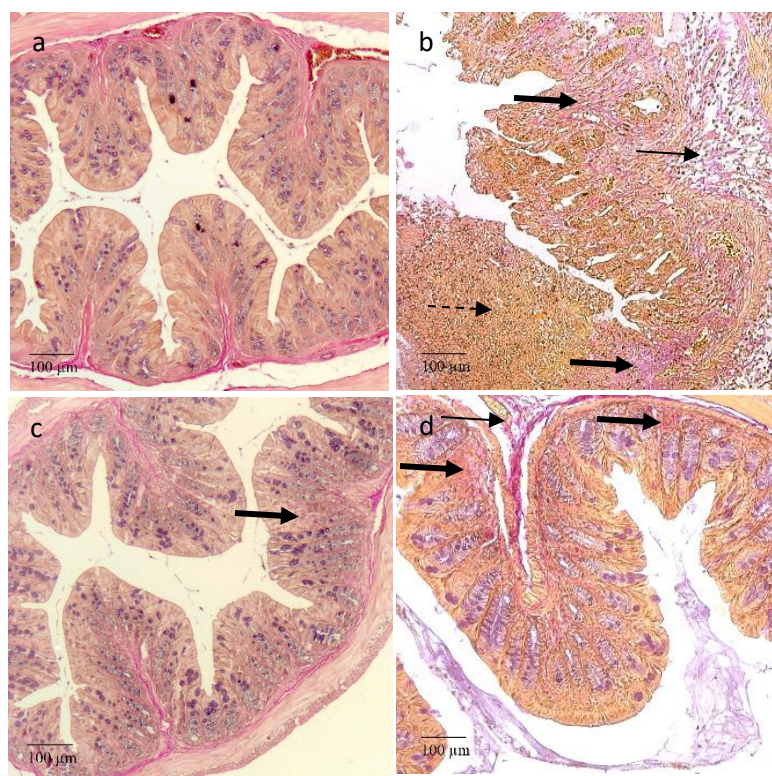

**Figure S2. Comparison of the efficacy of oxelumab and adalimumab *in vivo*.** Mice were treated as described in Figure 2. (A) Representative photomicrographs of Elastica-van-Gieson stained sections of distal parts of the colon from mice. (a) Unchallenged control, (b) ethanol challenged control treated with isotype, (c) ethanol challenged group treated with oxelumab, (d) ethanol challenged group treated with adalimumab. Arrows indicate edema and influx of inflammatory cells, dashed arrows indicate destruction of crypts and bold arrows fibrosis. (B) Histological scores depicted as boxplots. Boxes represent upper and lower quartiles, whiskers represent variability and outliers are plotted as individual points. For comparison of groups ANOVA followed by TukeyHSD was conducted. (0 '\*\*\*\*' 0.001 '\*\*\*' 0.01 '\*\*' 0.05).



**Table S1 Antibodies used to label human leukocytes**

| Surfacemarker                           | Colour                                                           | Cat # RRID #                            |
|-----------------------------------------|------------------------------------------------------------------|-----------------------------------------|
| CD19                                    | Peridine-chlorophyll-protein complex cyanine dye (PerCP-Cy™ 5.5) | BioLegend Cat# 302230, RRID:AB_2073119  |
| CD38                                    | Phycoerythrin (PE)                                               | BioLegend Cat# 356603, RRID:AB_2561899  |
| CD27                                    | Pe-Cy7                                                           | BioLegend Cat# 356411, RRID:AB_2562257  |
| IgD                                     | APC/Cy7                                                          | BioLegend Cat# 348218, RRID:AB_11203722 |
| CD4                                     | Allophycocyanin (APC)-Cy7                                        | BioLegend Cat# 317417, RRID:AB_571946   |
| CD45RA                                  | PE/Cy7                                                           | BioLegend Cat# 304126, RRID:AB_10708879 |
| CD45RO                                  | PE                                                               | BioLegend Cat# 304206, RRID:AB_314422   |
| CD62L                                   | FITC                                                             | BioLegend Cat# 304838, RRID:AB_2564162  |
| CCR7                                    | APC                                                              | BioLegend Cat# 353214, RRID:AB_10917387 |
| CXCR3                                   | FITC                                                             | BioLegend Cat# 353704, RRID:AB_10983066 |
| CCR6                                    | PE/Cy7                                                           | BioLegend Cat# 353405, RRID:AB_10918985 |
| CCR10                                   | APC                                                              | BioLegend Cat# 341505, RRID:AB_2291025  |
| CD8                                     | PerCP-Cy™ 5.5                                                    | BioLegend Cat# 344750, RRID:AB_2687201  |
| CD103                                   | APC                                                              | BioLegend Cat# 350215, RRID:AB_2563906  |
| CD14                                    | APC-Cy7                                                          | BioLegend Cat# 325619, RRID:AB_830692   |
| CD16                                    | PE                                                               | BioLegend Cat# 360703, RRID:AB_2562748  |
| TSLPR                                   | APC                                                              | BioLegend Cat# 322807, RRID:AB_2085327  |
| CD1a (biotin)/secondary Ab streptavidin | FITC                                                             | BioLegend Cat# 300112, RRID:AB_389344   |
| CD64                                    | PerCP-Cy™ 5.5                                                    | BioLegend Cat# 305023, RRID:AB_2561585  |
| CD163                                   | FITC                                                             | BioLegend Cat# 333617, RRID:AB_2563093  |
| CD206                                   | APC                                                              | BioLegend Cat# 321109, RRID:AB_571884   |
| CD16                                    | PE                                                               | BioLegend Cat# 302007, RRID:AB_314207   |
| CD11b                                   | APC-Cy7                                                          | BioLegend Cat# 301341, RRID:AB_2563371  |

|              |            |                                            |
|--------------|------------|--------------------------------------------|
| CD11c        | PE-Cy7     | BioLegend Cat# 301607,<br>RRID:AB_389350   |
| CD69         | FITC       | BioLegend Cat# 310903,<br>RRID:AB_314838   |
| CD25         | PE/Cy7     | BioLegend Cat# 302611,<br>RRID:AB_314281   |
| CD134 (Ox40) | PE         | BioLegend Cat# 350003,<br>RRID:AB_10641708 |
| CD127        | Per CP Cy5 | BioLegend Cat# 351321,<br>RRID:AB_10900253 |
| CD252        | PE         | BioLegend Cat# 108805,<br>RRID:AB_313404)  |

**Table S2 Cellular markers used to define immune cells**

| Marker                     | Definition                       |
|----------------------------|----------------------------------|
| CD19+ CD27+ IgD+           | Unswitched memory B-cell         |
| CD19+ CD27+ IgD-           | Switched memory B-cell           |
| CD19+ CD38+                | Plasma cell                      |
|                            |                                  |
| CD4+ CD45RO+ CD62L- CCR7-  | Effector memory CD4+ T- cell     |
| CD4+ CD45RO+ CD62L+, CCR7+ | Central memory                   |
| CD4+ CD103+                | Mucosal regulatory CD4+ T cell   |
| CD4+ CCR4+                 | Th2, effector regulatory T- cell |
| CD4+ CD25+ CD127-          | Regulatory T-cell                |
|                            |                                  |
| Th1                        | CD4+ CXCR3+                      |
| Th2                        | CD4+ CCR4+ CCR6-                 |
| Th17                       | CD4+ CCR4+ CCR6+                 |
| Th22                       | CD4+ CCR4+ CCR6+ CCR10+          |
|                            |                                  |
| CD4+ CD134+                | Activated CD4+ T cell            |
| CD4+ CD69+                 | Activated CD4+ T cell            |
| CD4+ CD25+                 | Activated CD4+ T cell            |
|                            |                                  |
| CD14+                      | MC*                              |
| CD14+ TSLPR+               | MC, expressing TSLPR             |
| CD14+ CD64+                | M1MC, FcγR1 expressing           |
| CD14+ CD163+ CD206+        | M2 MC, scavenging cells          |
| CD14+ CD1a                 | MC CD1a expressing               |
| CD11b+                     | cDC1**                           |
| CD11b+ CD80/86+            | cDC1, mature                     |
| CD11b+ TSLPR+              | cDC1 TSLPR expressing            |
| CD11b+ CD1a+               | cDC1 CD1a expressing             |

\*Monocyte

\*\*Conventional dendritic cell

TSLPR: Thymic stromal lymphopoietin receptor

**Table S3 Complete data set animal study**

| Leukocytes from spleen [% FoP]          | Mean    |         |          |            | SD      |           |          |            | n       |           |          |            |
|-----------------------------------------|---------|---------|----------|------------|---------|-----------|----------|------------|---------|-----------|----------|------------|
|                                         | Control | Isotype | Oxelumab | Adalimumab | Control | Challenge | Oxelumab | Adalimumab | Control | Challenge | Oxelumab | Adalimumab |
| CD4+                                    | 9,33    | 19      | 22,99    | 17,63      | 4,65    | 14,4      | 15,54    | 13,96      | 6       | 24        | 18       | 21         |
| CD4+ CD69+                              | 17,4    | 28,72   | 27,68    | 25,91      | 5,74    | 12,68     | 11,89    | 11,54      | 5       | 24        | 18       | 21         |
| CD4+ CD134+                             | 47,22   | 39,29   | 31       | 33,58      | 30,31   | 27,1      | 23,67    | 23,41      | 6       | 24        | 18       | 21         |
| CD4+ CD103+                             | 16,51   | 3,85    | 6,84     | 4,63       | 39,72   | 2,77      | 4,93     | 6,53       | 6       | 24        | 18       | 21         |
| CD4+ central memory                     | 3,34    | 13,75   | 9,21     | 13,59      | 2,28    | 11,66     | 10,39    | 17,11      | 6       | 24        | 18       | 22         |
| CD4+ effector memory                    | 73,55   | 52,99   | 57,92    | 60,1       | 4,98    | 30,22     | 25,12    | 25,58      | 6       | 24        | 18       | 22         |
| CD4+ effector                           | 60,85   | 24,16   | 27,52    | 30,82      | 7,93    | 30,25     | 41,39    | 35,38      | 6       | 24        | 18       | 23         |
| CD4+ naive                              | 2,24    | 30,09   | 32,63    | 34,24      | 1,11    | 32,01     | 33,07    | 35,79      | 6       | 24        | 18       | 23         |
| CD8+ effector memory                    | 63,31   | 29,32   | 8,47     | 28,5       | 9,17    | 22,26     | 2,31     | 20,67      | 6       | 13        | 6        | 11         |
| CD8+ central memory                     | 0,41    | 3,62    | 12,18    | 9,86       | 0,34    | 7,66      | 17,09    | 18,13      | 6       | 19        | 12       | 17         |
| CD14+                                   | 4,68    | 16,72   | 52,6     | 28,07      | 0,69    | 19,7      | 34,41    | 30,62      | 6       | 23        | 18       | 21         |
| CD14+ CD64+                             | 6,98    | 13,65   | 20,96    | 14,56      | 3,01    | 11,03     | 15,61    | 14,04      | 6       | 23        | 18       | 21         |
| CD14+ CD163+                            | 2,93    | 16,38   | 22,65    | 14,83      | 1,83    | 20,65     | 18,25    | 16,23      | 6       | 23        | 18       | 21         |
| CD14+ CD163+ CD206+                     | 1,91    | 9,68    | 12,93    | 7,53       | 2,52    | 12,25     | 12,97    | 9,06       | 6       | 18        | 12       | 15         |
| CD14+ TSLPR+*                           | 3,55    | 4,52    | 4,46     | 6,84       | 4,45    | 3,65      | 3,19     | 9,4        | 6       | 17        | 12       | 15         |
| CD19+                                   | 11,66   | 11,73   | 12,7     | 14,26      | 3,6     | 3,24      | 2,96     | 5,38       | 6       | 24        | 18       | 22         |
| CD19+ CD27+ IgD+                        | 7,85    | 37,12   | 61,02    | 43,78      | 3,41    | 36,8      | 34,46    | 38,68      | 6       | 24        | 18       | 22         |
| CD19+ CD27+ IgD-                        | 90,35   | 54,78   | 33,37    | 49,98      | 3,75    | 38,89     | 33,48    | 40,27      | 6       | 24        | 18       | 22         |
| <b>Scores</b>                           |         |         |          |            |         |           |          |            |         |           |          |            |
| Clinical Score                          | 2,33    | 3,11    | 0,94     | 1,45       | 0,51    | 3,25      | 0,72     | 1,14       | 6       | 26        | 18       | 24         |
| Histological Score                      | 0,16    | 4,08    | 1,58     | 2,08       | 0,4     | 2,3       | 2,23     | 1,69       | 6       | 24        | 17       | 24         |
| Colon Score                             | 0,33    | 2,75    | 0,55     | 0,87       | 0,51    | 1,7       | 1,42     | 1,32       | 6       | 24        | 18       | 24         |
| <b>Amino Acids [µmol / l]</b>           |         |         |          |            |         |           |          |            |         |           |          |            |
| Glutamic Acid                           | 60,25   | 100,79  | 117,96   | 91,61      | 19,46   | 21,13     | 19,65    | 24,36      | 6       | 21        | 17       | 19         |
| Aspartic Acid                           | 20,61   | 67,53   | 77,34    | 68,34      | 4,41    | 69,64     | 71,31    | 69,98      | 6       | 21        | 17       | 19         |
| <b>Cytokines [pg/ml]</b>                |         |         |          |            |         |           |          |            |         |           |          |            |
| ms IL-1β                                | 4,23    | 12,53   | 14,3     | 15,12      | 2,41    | 12,2      | 10,6     | 19,64      | 6       | 19        | 11       | 17         |
| ms IL-6                                 | 26,29   | 56,51   | 12,49    | 19,11      | 32,32   | 99,83     | 8,89     | 13,38      | 6       | 24        | 16       | 20         |
| hu IFNγ                                 |         | 2,28    | 2,29     | 3,12       |         | 2,49      | 2,37     | 3,1        |         | 12        | 11       | 10         |
| Hu IL-4                                 | 1,76    | 15,85   | 22,71    | 24,66      | 1,11    | 23,92     | 21,38    | 37,21      | 6       | 19        | 11       | 17         |
| * Thymic stromal lymphopoietin receptor |         |         |          |            |         |           |          |            |         |           |          |            |

| Leukocytes from spleen [% FoP]          | Δ                 | p-value | 95% CI |       | Δ                  | p-value | 95% CI |       | Δ                  | p-value  | 95% CI  |        |
|-----------------------------------------|-------------------|---------|--------|-------|--------------------|---------|--------|-------|--------------------|----------|---------|--------|
|                                         | Isotype / Control |         | lower  | upper | Oxelumab / Isotype |         | lower  | upper | Oxelumab / Control |          | lower   | upper  |
| CD4+                                    | 9,67              |         |        |       | 3,99               |         |        |       | 13,66              |          |         |        |
| CD4+ CD69+                              | 11,32             |         |        |       | -1,04              |         |        |       | 10,28              |          |         |        |
| CD4+ CD134+                             | -7,93             |         |        |       | -8,29              |         |        |       | -16,22             |          |         |        |
| CD4+ CD103+                             | -12,66            |         |        |       | 2,99               |         |        |       | -9,67              |          |         |        |
| CD4+ central memory                     | 10,41             |         |        |       | -4,54              |         |        |       | 5,87               |          |         |        |
| CD4+ effector memory                    | -20,56            |         |        |       | 4,93               |         |        |       | -15,63             |          |         |        |
| CD4+ effector                           | -36,69            |         |        |       | 3,36               |         |        |       | -33,33             |          |         |        |
| CD4+ naive                              | 27,85             |         |        |       | 2,54               |         |        |       | 30,39              |          |         |        |
| CD8+ effector memory                    | -33,99            | 0,003   | -58,41 | -9,57 | -20,85             |         |        |       | -54,84             | 6E-05    | -83,4   | -26,27 |
| CD8+ central memory                     | 3,21              |         |        |       | 8,56               |         |        |       | 11,77              |          |         |        |
| CD14+                                   | 12,04             |         |        |       | 35,88              |         |        |       | 47,92              |          |         |        |
| CD14+ CD64+                             | 6,67              |         |        |       | 7,31               |         |        |       | 13,98              |          |         |        |
| CD14+ CD163+                            | 13,45             |         |        |       | 6,27               |         |        |       | 19,72              | 0,09     | -2,49   | 41,93  |
| CD14+ CD163+ CD206+                     | 7,77              |         |        |       | 3,25               |         |        |       | 11,02              |          |         |        |
| CD14+ TSLPR+*                           | 0,97              |         |        |       | -0,06              |         |        |       | 0,91               |          |         |        |
| CD19+                                   | 0,07              |         |        |       | 0,97               |         |        |       | 1,04               |          |         |        |
| CD19+ CD27+ IgD+                        | 29,27             |         |        |       | 23,9               |         |        |       | 53,17              | 0,01     | 9,14    | 97,19  |
| CD19+ CD27+ IgD-                        | -35,57            |         |        |       | -21,41             |         |        |       | -56,98             | 0,008    | -102,33 | -11,61 |
| <b>Scores</b>                           |                   |         |        |       |                    |         |        |       |                    |          |         |        |
| Clinical Score                          | 0,78              |         |        |       | -2,17              | 0,0006  | -3,21  | -0,1  | -1,39              |          |         |        |
| Histological Score                      | 3,92              | 3E-04   | 1,5    | 6,32  | -2,5               | 0,001   | -4,16  | -0,82 | 1,42               |          |         |        |
| Colon Score                             | 2,42              | 2E-03   |        |       | -2,2               | 4E-05   | -3,38  | -1    | 0,22               |          |         |        |
| <b>Amino Acids [μmol / l]</b>           |                   |         |        |       |                    |         |        |       |                    |          |         |        |
| Glutamic Acid                           | 40,54             | 8E-04   | 14,02  | 67,06 | 17,17              |         |        |       | 57,71              | 3,00E-06 | 30,51   | 84,91  |
| Aspartic Acid                           | 46,92             |         |        |       | 9,81               |         |        |       | 56,73              |          |         |        |
| <b>Cytokines [pg/ml]</b>                |                   |         |        |       |                    |         |        |       |                    |          |         |        |
| ms IL-1β                                | 8,3               |         |        |       | 1,77               |         |        |       | 10,07              |          |         |        |
| ms IL-6                                 | 30,22             |         |        |       | -44,02             |         |        |       | -13,8              |          |         |        |
| hu IFNγ                                 |                   |         |        |       | 0,01               |         |        |       | 2,29               |          |         |        |
| Hu IL-4                                 | 14,09             |         |        |       | 6,86               |         |        |       | 20,95              |          |         |        |
| * Thymic stromal lymphopoietin receptor |                   |         |        |       |                    |         |        |       |                    |          |         |        |

|                                              | $\Delta$             |         | 95% CI |       | $\Delta$              |         | 95% CI |       |
|----------------------------------------------|----------------------|---------|--------|-------|-----------------------|---------|--------|-------|
| Leukocytes from spleen [% FoP]               | Adalimumab / Isotype | p-value | lower  | upper | Oxelumab / Adalimumab | p-value | lower  | upper |
| CD4+                                         | -1,37                |         |        |       | -5,36                 |         |        |       |
| CD4+ CD69+                                   | -2,81                |         |        |       | -1,77                 |         |        |       |
| CD4+ CD134+                                  | -5,71                |         |        |       | 2,58                  |         |        |       |
| CD4+ CD103+                                  | 0,78                 |         |        |       | -2,21                 |         |        |       |
| CD4+ central memory                          | -0,16                |         |        |       | 4,38                  |         |        |       |
| CD4+ effector memory                         | 7,11                 |         |        |       | 2,18                  |         |        |       |
| CD4+ effector                                | 6,66                 |         |        |       | 3,3                   |         |        |       |
| CD4+ naive                                   | 4,15                 |         |        |       | 1,61                  |         |        |       |
| CD8+ effector memory                         | -0,82                |         |        |       | 20,03                 |         |        |       |
| CD8+ central memory                          | 6,24                 |         |        |       | -2,32                 |         |        |       |
| CD14+                                        | 11,35                |         |        |       | -24,53                |         |        |       |
| CD14+ CD64+                                  | 0,91                 |         |        |       | -6,4                  |         |        |       |
| CD14+ CD163+                                 | -1,55                |         |        |       | -7,82                 |         |        |       |
| CD14+ CD163+ CD206+                          | -2,15                |         |        |       | -5,4                  |         |        |       |
| CD14+ TSLPR+*                                | 2,32                 |         |        |       | 2,38                  |         |        |       |
| CD19+                                        | 2,53                 |         |        |       | 1,56                  |         |        |       |
| CD19+ CD27+ IgD+                             | 6,66                 |         |        |       | -17,24                |         |        |       |
| CD19+ CD27+ IgD-                             | -4,8                 |         |        |       | 16,61                 |         |        |       |
| <b>Scores</b>                                |                      |         |        |       |                       |         |        |       |
| Clinical Score                               | -1,66                | 0,03    | -3,21  | -0,1  | 0,51                  |         |        |       |
| Histological Score                           | -2                   | 5E-03   | -3,52  | -0,47 | 0,5                   |         |        |       |
| Colon Score                                  | -1,88                | 1E-04   |        |       | 0,32                  |         |        |       |
| <b>Amino Acids [<math>\mu</math>mol / l]</b> |                      |         |        |       |                       |         |        |       |
| Glutamic Acid                                | -9,18                |         |        |       | -26,35                |         |        |       |
| Aspartic Acid                                | 0,81                 |         |        |       | -9                    |         |        |       |
| <b>Cytokines [pg/ml]</b>                     |                      |         |        |       |                       |         |        |       |
| ms IL-1 $\beta$                              | 2,59                 |         |        |       | 0,82                  |         |        |       |
| ms IL-6                                      | -37,4                |         |        |       | 6,62                  |         |        |       |
| hu IFN $\gamma$                              | 0,84                 |         |        |       | 0,83                  |         |        |       |
| Hu IL-4                                      | 8,81                 |         |        |       | 1,95                  |         |        |       |

**Table S4 Scores of individual mice**

| <b>Maus</b> | <b>Donor</b> | <b>Treatment</b> | <b>Clinical Score</b> | <b>Colon Score</b> | <b>Histological Score</b> |
|-------------|--------------|------------------|-----------------------|--------------------|---------------------------|
| 1           | A            | Isotype          | 1                     | 2                  | 3                         |
| 2           | A            | Isotype          | 1                     | 2                  | 4                         |
| 3           | A            | Isotype          | 3                     | 3                  | 3                         |
| 4           | A            | Isotype          | 1                     | 4                  | 5                         |
| 5           | A            | Isotype          | 1                     | 1                  | 5                         |
| 6           | A            | Isotype          | 2                     | 5                  | 3                         |
| 7           | A            | Adalimumab       | 0                     | 1                  | 2                         |
| 8           | A            | Adalimumab       | 3                     | 3                  | 8                         |
| 9           | A            | Adalimumab       | 1                     | 0                  | 4                         |
| 10          | A            | Adalimumab       | 2                     | 0                  | 2                         |
| 11          | A            | Adalimumab       | 2                     | 1                  | 2                         |
| 12          | A            | Adalimumab       | 1                     | 1                  | 0                         |
| 13          | A            | Oxelumab         | 2                     | 0                  | 0                         |
| 14          | A            | Oxelumab         | 2                     | 0                  | 2                         |
| 15          | A            | Oxelumab         | 1                     | 0                  | 0                         |
| 16          | A            | Oxelumab         | 0                     | 1                  | 1                         |
| 17          | A            | Oxelumab         | 2                     | 6                  | 7                         |
| 18          | A            | Oxelumab         | 1                     | 1                  | 0                         |
| 1           | B            | Isotype          | 0                     | 1                  | 5                         |
| 2           | B            | Isotype          | 1                     | 1                  | 2                         |
| 3           | B            | Isotype          | 1                     | 1                  | 3                         |
| 4           | B            | Isotype          | 1                     | 6                  | 5                         |
| 5           | B            | Isotype          | 8                     | 6                  | 11                        |
| 6           | B            | Isotype          | 4                     | 3                  | 9                         |
| 7           | B            | Adalimumab       | 0                     | 0                  | 0                         |
| 8           | B            | Adalimumab       | 1                     | 0                  | 2                         |
| 9           | B            | Adalimumab       | 1                     | 0                  | 2                         |
| 10          | B            | Adalimumab       | 2                     | 1                  | 1                         |
| 11          | B            | Adalimumab       | 2                     | 2                  | 1                         |
| 12          | B            | Adalimumab       | 0                     | 1                  | 3                         |
| 13          | B            | Oxelumab         | 0                     | 0                  | 0                         |
| 14          | B            | Oxelumab         | 0                     | 0                  | 3                         |
| 15          | B            | Oxelumab         | 1                     | 1                  | 0                         |
| 16          | B            | Oxelumab         | 1                     | 0                  | 3                         |
| 17          | B            | Oxelumab         | 1                     | 0                  | 0                         |
| 18          | B            | Oxelumab         | 0                     | 0                  | 1                         |
| 25          | B            | Isotype          | 13                    |                    |                           |
| 1           | C            | Isotype          | 0                     | 2                  | 5                         |
| 2           | C            | Isotype          | 2                     | 2                  | 5                         |
| 3           | C            | Isotype          | 5                     | 2                  | 3                         |
| 4           | C            | Isotype          | 0                     | 2                  | 3                         |
| 5           | C            | Isotype          | 2                     | 2                  | 2                         |
| 12          | C            | Oxelumab         | 1                     | 0                  |                           |



|    |   |            |    |   |   |
|----|---|------------|----|---|---|
| 13 | C | Oxelumab   | 1  | 0 | 0 |
| 14 | C | Oxelumab   | 1  | 0 | 0 |
| 15 | C | Oxelumab   | 0  | 0 | 0 |
| 16 | C | Oxelumab   | 2  | 1 | 5 |
| 17 | C | Oxelumab   | 1  | 0 | 5 |
| 18 | C | Adalimumab | 1  | 0 | 1 |
| 19 | C | Adalimumab | 1  | 0 | 2 |
| 20 | C | Adalimumab | 1  | 0 | 2 |
| 21 | C | Adalimumab | 3  | 0 | 2 |
| 22 | C | Adalimumab | 1  | 0 | 2 |
| 23 | C | Adalimumab | 2  | 0 | 2 |
| 24 | C | Isotype    | 8  |   |   |
| 1  | D | Isotype    | 4  | 3 | 5 |
| 2  | D | Isotype    | 10 | 5 | 6 |
| 3  | D | Isotype    | 3  | 6 | 3 |
| 4  | D | Isotype    | 3  | 1 | 0 |
| 5  | D | Isotype    | 2  | 3 | 3 |
| 6  | D | Isotype    | 2  | 1 | 3 |
| 7  | D | Isotype    | 3  | 2 | 2 |
| 8  | D | Adalimumab | 2  | 1 | 1 |
| 9  | D | Adalimumab | 1  | 1 | 1 |
| 10 | D | Adalimumab | 2  | 1 | 1 |
| 11 | D | Adalimumab | 0  | 1 | 1 |
| 12 | D | Adalimumab | 1  | 1 | 3 |
| 13 | D | Adalimumab | 5  | 6 | 5 |
| 14 | D | Control    | 2  | 0 | 0 |
| 15 | D | Control    | 3  | 0 | 0 |
| 16 | D | Control    | 2  | 0 | 0 |
| 17 | D | Control    | 3  | 0 | 1 |
| 18 | D | Control    | 2  | 1 | 0 |
| 19 | D | Control    | 2  | 1 | 0 |
